# Supplementary material for: Organisation and delivery of liaison psychiatry services in general hospitals in England: results of a national survey
Source: PubMed Central journal article supplement (PMC6120655; doi:10.1136/bmjopen-2018-023091), 2018-09-01
Supplement: bmjopen-2018-023091.draft_revisions.pdf [file bmjopen-2018-023091.draft_revisions.pdf]

# BMJ Open

BMJ Open is committed to open peer review. As part of this commitment we make the peer review history of every article we publish publicly available.

When an article is published we post the peer reviewers' comments and the authors' responses online. We also post the versions of the paper that were used during peer review. These are the versions that the peer review comments apply to.

The versions of the paper that follow are the versions that were submitted during the peer review process. They are not the versions of record or the final published versions. They should not be cited or distributed as the published version of this manuscript.

BMJ Open is an open access journal and the full, final, typeset and author-corrected version of record of the manuscript is available on our site with no access controls, subscription charges or pay-per-view fees (<http://bmjopen.bmj.com>).

If you have any questions on BMJ Open's open peer review process please email [info.bmjopen@bmj.com](mailto:info.bmjopen@bmj.com)

# BMJ Open

## The Organisation and Delivery of Liaison Psychiatry Services in General Hospitals in England: results of a National Survey

|                               |                                                                                                                                                                                                                                                                                                                                                                                                                                                                                                                                                                                                                                                                                                                                                                 |
|-------------------------------|-----------------------------------------------------------------------------------------------------------------------------------------------------------------------------------------------------------------------------------------------------------------------------------------------------------------------------------------------------------------------------------------------------------------------------------------------------------------------------------------------------------------------------------------------------------------------------------------------------------------------------------------------------------------------------------------------------------------------------------------------------------------|
| Journal:                      | <i>BMJ Open</i>                                                                                                                                                                                                                                                                                                                                                                                                                                                                                                                                                                                                                                                                                                                                                 |
| Manuscript ID                 | bmjopen-2018-023091                                                                                                                                                                                                                                                                                                                                                                                                                                                                                                                                                                                                                                                                                                                                             |
| Article Type:                 | Research                                                                                                                                                                                                                                                                                                                                                                                                                                                                                                                                                                                                                                                                                                                                                        |
| Date Submitted by the Author: | 20-Mar-2018                                                                                                                                                                                                                                                                                                                                                                                                                                                                                                                                                                                                                                                                                                                                                     |
| Complete List of Authors:     | Walker, Andrew; National Institute of Health Research Clinical Research Network<br>Barrett, Jessica; Royal College of Psychiatrists, National Collaborating Centre for Mental Health<br>Lee, William; University of Plymouth, Peninsula Schools of Medicine & Dentistry<br>West, Robert; University of Leeds, Leeds Institute of Health Sciences<br>Guthrie, Elspeth; University of Leeds Leeds Institute of Health Sciences, Psychological and Social Medicine<br>Trigwell, Peter; Leeds and York Partnership NHS Foundation Trust, National Inpatient Centre for Psychological Medicine<br>Quirk, Alan; Royal College of Psychiatrists, CCQI<br>Crawford, Mike; Imperial College London, Psychological Medicine<br>House, Allan; Academic Unit of Psychiatry, |
| Keywords:                     | consultation-liaison, liaison psychiatry, hospital psychiatry, development                                                                                                                                                                                                                                                                                                                                                                                                                                                                                                                                                                                                                                                                                      |
|                               |                                                                                                                                                                                                                                                                                                                                                                                                                                                                                                                                                                                                                                                                                                                                                                 |

SCHOLARONE™  
Manuscripts

Only

1  
2  
3 The Organisation and Delivery of Liaison Psychiatry Services in General Hospitals  
4  
5 in England: results of a National Survey  
6  
7  
8

9 Walker A<sup>1</sup>, Barrett J.R<sup>2</sup>, Lee W<sup>3</sup>, West R<sup>4</sup>, Guthrie E<sup>4</sup>, Trigwell P<sup>5</sup>, Quirk A<sup>6</sup>, Crawford M.J<sup>6,7</sup>, House  
10 A<sup>4</sup>  
11

- 12  
13 1. Clinical Research Network National Coordinating Centre, National Institute of Health  
14 Research Clinical Research Network, Leeds  
15  
16 2. National Collaborating Centre for Mental Health, The Royal College of Psychiatrists  
17  
18 3. Institute of translational and Stratified Medicine, Plymouth University Peninsula Schools of  
19 Medicine and Dentistry. Plymouth. UK.  
20  
21 4. Leeds Institute of Health Sciences, University of Leeds. Leeds. UK.  
22  
23 5. National Inpatient Centre for Psychological Medicine, Leeds and York Partnership NHS  
24 Foundation Trust. Leeds. UK.  
25  
26 6. College Centre for Quality Improvement. Royal College of Psychiatrists, London. UK.  
27  
28 7. Centre for Psychiatry. Department of Medicine. Imperial College London. London. UK.

29 Corresponding author: Professor Else Guthrie: e.a.guthrie@leeds.ac.uk  
30

31 Key words: Consultation-liaison, development, hospital psychiatry, liaison psychiatry  
32  
33  
34  
35  
36  
37  
38  
39  
40  
41  
42  
43  
44  
45  
46  
47  
48  
49  
50  
51  
52  
53  
54  
55  
56  
57  
58  
59  
60

**Word Count :3943**

**Abstract: 298**

## ABSTRACT

**Objectives:** To describe current provision of hospital-based liaison psychiatry services in England, and to determine different models of liaison service that are currently operating in England.

**Design:** Cross-sectional observational study comprising an electronic survey followed by targeted telephone interviews.

**Setting:** All 179 acute hospitals with an Emergency Department in England.

**Participants:** 168 hospitals that had a liaison psychiatry service completed an electronic survey. Telephone interviews were conducted for 57 hospitals that reported specialist liaison services additional to provision for acute care.

**Measures:** Data included the location, service structures and staffing, working practices, relations with other mental health service providers, policies such as response times and funding. Model-based clustering was used to characterise the services. Telephone interviews identified the range of additional liaison psychiatry services provided.

**Results:** Most hospitals (141, 79%) reported a 7-day service responding to acute referrals from the Emergency Department and wards. However, under half of hospitals had 24-hour access to the service (78, 44%). A third of hospitals (57, 32%) provided non-acute liaison work including outpatient clinics and links to specialist hospital services. 156 hospitals (87%) had a multidisciplinary service including a psychiatrist and mental health nurses. We derived a four-cluster model of liaison psychiatry using variables resulting from the electronic survey; the salient features of clusters were staffing numbers, especially nursing; provision of rapid response 24-hour 7-day acute services; offering outpatient and other non-acute work, and containing age-specific teams for older adults.

**Conclusions:** This is the most comprehensive study to date of liaison psychiatry in England, and demonstrates the wide availability of such services nationally. Although all services provide an acute assessment function, there is no uniformity about hours of coverage or expectation of response times. Most services were better characterised by the model we developed than by current classification systems for liaison psychiatry.

## Article Summary

### Strengths and limitations of this study

- A comprehensive national survey of liaison psychiatry services in acute hospitals, at a time of increased government investment, and debate about equity of access to mental and physical healthcare.
- The survey obtained 100% response rate for all hospitals in England with an Emergency Department.
- Classification of services was carried out using model-based clustering.
- A limitation was that service provision was reported by the services themselves rather than based on independent observation.
- Mental health services provided by clinicians outside of the liaison psychiatry service were not comprehensively reviewed.

## INTRODUCTION

Liaison psychiatry is the sub-specialty of psychiatry concerned with clinical practice, teaching and research in non-psychiatric clinical settings: the 'liaison' referred to is therefore between psychiatry and other clinical disciplines. In the UK it has been largely based in acute ("general") hospitals. The origins of liaison psychiatry can be traced to the 1930s but substantial growth only occurred in the post-war decades (1-4): The UK's Royal College of Psychiatrists established its Faculty of Liaison Psychiatry in 1997 and first published a competency-based curriculum for postgraduate training in Liaison Psychiatry in 2009 (5).

The case for liaison psychiatry services rested initially upon observations that the prevalence of many psychiatric problems in acute hospitals is well above general population levels and that such co-morbidities can pose particular management challenges (6). People with problems such as psychosis, panic, delirium or self-harm may present to the Emergency Department, or their difficulties may become apparent on inpatient wards - perhaps requiring rapid assessment and intervention (7). Liaison psychiatry services also see people with more longstanding problems such as difficulty adjusting to severe physical illness, or complex physical health and mental health conditions – such work mostly being undertaken in outpatient clinics.

Recent interest in liaison psychiatry in the UK (8) has been focussed on two issues – cost savings that might result from the service, and the need to provide equitable access to emergency care for all patients regardless of whether their problems are primarily physical, psychiatric, or a combination (9).

The suggestion that financial savings from timely psychiatric intervention are sufficient to pay for the liaison psychiatry service undertaking that intervention, the so-called "cost-offset" effect, is not new (10). Most recently it attracted interest in the UK following the publication of a report from one English hospital which reported that their "Rapid Assessment Intervention and Discharge" (RAID) service achieved reductions in average inpatient lengths of stay in the target population of up to four days, even for patients not directly seen by the service (11) (12).

An important influence in current debate in the UK has been the classification of hospitals in terms of four service grades proposed by Aitken et al 2014 (13) (See Appendix for details). This classification was based on services already in existence that were capable of delivering certain levels of coverage in the hospital. It has been used to inform commissioning of services, with the aim

1  
2  
3 that all hospitals with Emergency Departments should have a liaison service meeting such standards  
4 by 2020 (14).

5  
6 Here we present findings from the most detailed survey of liaison psychiatry services yet undertaken  
7 in England, describing their structures and staffing levels and their relation to other mental health  
8 services associated with the acute hospitals in which they are located. The aim was to describe  
9 current provision of hospital-based liaison psychiatry services in England, and to determine different  
10 models of liaison service that are currently operating.

11  
12 This work arises from the first phase of a programme of research funded by the National Institute of  
13 Health Services (NIHR), to evaluate the cost-effectiveness and efficiency of different configurations  
14 of liaison psychiatry services in England (LP-MAESTRO)  
15 (<http://www.nets.nihr.ac.uk/projects/hsdr/135808>), and an annual mapping survey of liaison  
16 services funded by Health Education England, NHS England and the Royal College of Psychiatrists. A  
17 prior survey of liaison psychiatry services was carried out in 2013 (unpublished), and this paper  
18 describes the second study (15), which was carried out in conjunction with the LP-MAESTRO  
19 programme.  
20  
21  
22

## 23 **METHOD**

### 24 ***Setting and sample***

25  
26 The sample consisted of all acute hospitals in England that had an Emergency Department at the  
27 time. Acute Trusts were identified from the NHS website  
28 ([www.nhs.uk/servicedirectories/pages/nhstrustlisting.aspx](http://www.nhs.uk/servicedirectories/pages/nhstrustlisting.aspx)) and individual hospitals were then  
29 identified from Trust websites.  
30  
31  
32

33 Within each hospital liaison psychiatry service we identified *components* of service - typically defined  
34 by the part of the hospital covered by that component - for example: emergency department, ward  
35 referrals, links to specialist services, liaison psychiatry outpatient clinics.  
36

37 Each component of the service might then have different *characteristics* such as staff mix, working  
38 hours, performance targets, patient-groups seen etc.  
39

### 40 ***Design***

41  
42 Cross-sectional two-stage survey conducted by email and telephone interview.  
43  
44

### 45 ***Measures***

46  
47 The email survey ran between 14 May 2015 and 30 April 2015. The survey was brief and allowed  
48 flexible (free text) responses. Response was by email or telephone. Non-responding hospitals and  
49 missing response items were followed up by email and telephone. The questions asked in the email  
50 are given in Appendix 1.  
51

52 We derived two variables describing RAID services. The first, "original RAID", is based upon the  
53 description provided in Tadros et al (12) of the service evaluated at Birmingham City Hospital; the  
54 second, "modified RAID", is based upon the profile of current services in Birmingham still known as  
55 RAID. We characterised each service according to whether they met the criteria for either of these  
56  
57  
58  
59  
60

1  
2  
3 service types. We also used responses on staffing level or working practice to classify each service  
4 according to recent guidance from NHS England that was created to help commissioners in planning  
5 service delivery (13). The grades used in the guidance are as follows: Comprehensive (full liaison  
6 provision), Enhanced 24 (staffed according to the original RAID model), Core 24 (provides acute  
7 provision for a hospital with an Emergency Department, but no out-patient work) and Core  
8 (intended for less busy hospitals); services not meeting Core criteria were classified as Sub-Core (see  
9 Appendices 2 and 3 for details).

10  
11  
12 A telephone interview survey ran between the 16.7.15 and 30.9.15. It was undertaken to obtain  
13 further details about services that reported that they provided liaison services in addition to  
14 provision for acute care of patients in the ED or on the acute hospital wards (e.g. out-patient  
15 services or specialist renal input).

16  
17  
18 Data from the survey have been published by the Royal College of Psychiatrist (15). What we present  
19 in this paper is a re-classification of these data (carried out by the LP-MAESTRO team), a statistical  
20 analysis of the data using cluster analysis, and results of the telephone survey, none of which has  
21 been previously published.

### 22 23 **Patient involvement**

24  
25 Further work in the LP-MAESTRO programme will focus on patient experience.  
26  
27

### 28 29 **ANALYSIS**

30  
31 The main analyses were undertaken with R statistical software version 3.2.2 (R core team 2016).  
32

33 A latent class model (16) was fitted to perform clustering of responding hospitals. The number of  
34 clusters to be used was determined by minimising the Bayesian Information Criterion (BIC) because  
35 the BIC tends to favour less complexity. Models were fitted only if the number of observations (168)  
36 exceeded the number of parameters used in the model, thus ensuring a positive number of degrees  
37 of freedom. Other hospital properties were extracted from the survey and used as covariates in this  
38 model-based clustering approach.  
39  
40

41 Many of the variables used in clustering were categorical. Variables which might have been regarded  
42 as continuous were categorised so that all were handled in a similar way. For example, the number  
43 of hours of operation of the service was defined as three categories: 40–80 hours per week, 81–167  
44 hours per week, and 168 (=7x24) hours per week. Since all variables to be clustered were  
45 categorical, the polytomous latent class analysis package polCA version 1.4.1 (16) with R statistical  
46 software version 3.2.0 (R core team 2015) was used for all analyses. The latent class function made  
47 use of the Expectation–Maximisation algorithm and there was the possibility of convergence to a  
48 local maximum rather than a global maximum. To overcome this, multiple starts were used (17).  
49  
50

### 51 52 **RESULTS**

#### 53 54 ***Staffing and working practices***

55  
56  
57  
58  
59  
60



1  
2  
3 Data were obtained on all 179 acute hospitals identified in England: 168 (94%) reported that they  
4 had a Liaison Psychiatry service; eleven had no service. All 168 hospitals with a liaison service  
5 completed the electronic survey and answered questions in follow up emails and telephone calls,  
6 ensuring that there were no missing data.  
7

8 Twelve services were nurse-only services. All other services were multidisciplinary and all included at  
9 least a psychiatrist of some grade and a mental health nurse. One hundred and forty one hospitals  
10 (79%) reported at least one consultant psychiatrist as part of the team (total number =195), 95  
11 hospitals (53%) reported other psychiatrists (non-consultant grade), 42 hospitals (23%) reported a  
12 psychologist or psychological therapist as part of the team, 26 hospitals (15%) reported allied health  
13 professionals and 52 hospitals (29%) reported other mental health staff. All 168 hospitals with a  
14 liaison service had nursing staff as part of the team and there were 1,384 whole time equivalents  
15 working in liaison services at the time of the survey.  
16  
17

18  
19 141 hospitals (79%) provided a 7-day service and 15 hospitals (8%) provided a service Monday to  
20 Friday. Of the 141 hospitals providing 7-day services, 78 (55%) reported a 24-hour 7-day service.  
21

22 Out of the 168 hospitals that had a liaison service, 75 hospitals (45%) had target response times of  
23 one hour or less for referrals from the Emergency Department and 73 hospitals (43%) reported  
24 target response times to referrals from the wards as less than one day. Sixty four hospitals (38%) had  
25 no target response time.  
26

27 Nearly all of the liaison services (99%) saw patients who were referred following self-harm (167  
28 hospitals) and many saw patients for assessment of alcohol and substance misuse (106 hospitals  
29 63%). Only 37 services (22%) saw patients with learning disabilities. 44 services (26%) had separate  
30 older adult and working age adult teams.  
31  
32

33 57 hospitals (34%) reported a service or component of service that did more than serve the acute  
34 care pathway, and 4 of these hospitals operated virtually separate liaison services for acute and non-  
35 acute referrals.  
36

### 37 **Classification according to RAID and Core.**

38  
39 Of the 168 hospitals, only 8 met the original RAID criteria and 35 met criteria for modified RAID. Ten  
40 liaison services had the term RAID in their title, without meeting either of the RAID criteria.  
41

42  
43 Of the 168 hospitals, one was rated as Comprehensive, three were Enhanced24 (2%), 13 were  
44 Core24 (8%), 18 were Core (11%) and 133 were Sub-Core (79%). The Comprehensive rated service  
45 met modified RAID criteria, two of the Enhanced24 services met Original RAID criteria and the final  
46 Enhanced24 service did not meet either RAID criterion. Of those services that met either RAID  
47 criterion, 28/41 (68%) were rated as Core or Sub-Core.  
48

### 49 ***Types of liaison psychiatry service: results from cluster analysis***

50  
51 We used data from the email survey to cluster the services using characteristics listed in Table 1.  
52

53  
54 The minimum value of Bayesian Information Criterion was with four clusters, but the value for three  
55 clusters was very near the minimum also. Hence a decision was required between three and four  
56 clusters and we decided the model with four clusters was more interpretable and useful. Hospitals  
57  
58

1  
2  
3 were assigned to a cluster according to their modal probability: that is hospitals were labelled as a  
4 certain cluster when the model gave a probability of membership of that cluster to be larger than  
5 that of any other. Table 2 shows the modal cluster membership tabulated against hospital  
6 characteristics.  
7

8 Model-based clustering identified four classes. These do not represent discrete categories but  
9 rather services that are relatively similar to each other in a diverse landscape.  
10

- 11 • Cluster 1: Services tended to be based in smaller hospitals, had the smallest numbers of  
12 consultant staff and nurses. Only a minority offered 24-hour 7-day cover, few had predefined  
13 response times and none met either of the RAID criteria. Few offered outpatient clinics and none  
14 offered care outside the acute pathway.  
15
- 16 • Cluster 2: Services were most likely to meet one of the RAID criteria, providing 24-hour 7-day  
17 cover, working to response-time targets for Emergency Department and ward referrals and  
18 concentrating exclusively on the acute care pathway with no follow-up outpatient clinics.  
19
- 20 • Cluster 3: Services were more diverse with some offering 24-hour 7-day services, but the  
21 defining feature, was that they also offered outpatient clinics and covered care outside the acute  
22 care pathway; they had the highest number of consultants and nurses – number of nurses being  
23 an important determinant of the probability of membership in this cluster.  
24
- 25 • Cluster 4: These were also diverse services, a third offering outpatient clinics and work outside  
26 the acute pathway; only a minority provided 24-hour 7-day cover or worked to response time  
27 targets and none met either of the RAID criteria. All these hospitals had separate teams for  
28 working-age adults and for older persons.  
29

### 30 ***The nature of clinical services; telephone interviews***

31  
32 We undertook telephone interviews covering 57 hospitals and 61 separate liaison services; four  
33 hospitals had two distinctly different liaison teams. The telephone interviews reflected the clustering  
34 with most of those interviewed being in clusters 3 and 4: cluster 1: n=8, cluster 2: n=4, cluster 3:  
35 n=30 and cluster 4: n=19.  
36  
37

### 38 ***Emergency Department referrals***

39  
40 57 out of the 61 services (93%) saw acute referrals from the Emergency Department. Most (53, 87%)  
41 were available Monday to Sunday, and n=32 (52%) were available 24 hours a day. 49 (80%) of the  
42 services responded to referrals of adult patients of any age, but entry criteria could be quite specific  
43 – for example, one service saw all working age adults throughout the day and older age adults only  
44 for the first half of the night. Most Emergency Department liaison psychiatry teams (51, 84%) were  
45 multidisciplinary although five consisted of nursing staff only.  
46  
47

48 Referrals from the Emergency Department varied considerably in scope and numbers; out of the 46  
49 reported referral rates the mean number of weekly referrals was 36 (min=1, max=100). In addition  
50 to assessment, most services that were interviewed (36, 59%) offered Emergency Department  
51 patients out-patient follow-up.  
52  
53

54 All of the 57 services which served the Emergency Department had key performance indicators, and  
55 almost three in four (n=43, 70%) measured patient outcome in some way.  
56  
57

### ***Ward referrals***

Fifty seven services accepted ward referrals. Most (n=46, 75%) were available to wards 7 days, and nearly one third (n=20, 33%) were available to wards 24 hours a day. Almost three out of four (n=44, 72%) responded to referrals from wards for adult patients of any age, five services responded to referrals from wards only for older adults, and nine responded to referrals from wards only for working age adults.

Again most ward teams (53, 87%) were multidisciplinary teams although four consisted of medical staff only, three consisted of nursing staff only, and one staffed the ward team with psychiatrists and psychologists. Based upon 47 reported referral rates the mean number of weekly referrals was 25. All responding services assessed patients and offered short term follow-up on medical wards, and over half (n=34, 56%) offered out-patient follow-up.

50 of those we interviewed had key performance indicators for wards, and 42 (69%) measured patient outcome in some way for ward referrals.

### ***Self-harm referrals***

All but two services accepted referrals for self-harm. 51 (84%) offered a 7 day service, 29 (48%) provided a service 24 hours a day, and most (n=46, 75%) offered a service to adults of all ages.

Most services we interviewed (54, 89%) said their self-harm teams were multidisciplinary. All services assessed patients on wards and approximately half (n=31, 51%) offered short-term follow-up on medical wards. Only eight services described a separate self-harm out-patient clinic, although several services described seeing small numbers of selected patients.

### ***Liaison psychiatry with named specialist services***

Twenty services (33%) provided specialist liaison services to at least one named specialist service or department in the hospital. A total of 31 different specialist services were reported; the most frequently reported were gastroenterology (n=5), hepatology (n=4) palliative care (n=4), maternity, neurology, trauma and transplant (n=3 each).

### ***Outpatient clinics***

33 services (54%) provided a general liaison psychiatry outpatient clinic and 28 services (46%) reported running an outpatient clinic for particular specialist groups; 20 services had both types of clinic. Twenty two of the general liaison psychiatry clinics saw patients of any adult age and 11 clinics saw working age adults only. Thirteen clinics were staffed with a multidisciplinary team, 15 were solely medical, two had nursing staff only and three clinics included a psychologist. Referrals to the general liaison psychiatry clinic came predominantly from the acute hospital in which they were based (n=26). Thirty one clinics offered short-term treatment and follow-up and 18 offered longer-term treatment and follow-up.

The most commonly reported specialist clinics were for medically unexplained symptoms (n=7), diabetes (n=4), bariatric surgery patients (n=4), respiratory disease (n=3) and perinatal psychiatry (n=3). Most clinics offered some form of psychological therapy – Problem Solving Therapy, (n=46,

1  
2  
3 75%) Motivational Interviewing, (n=38, 62%) Cognitive Behavioural Therapy (n=35, 57%) Behavioural  
4 Activation (n=31, 51%) or Interpersonal Therapy (n=26, 43%).  
5  
6

### 7 ***Other acute hospital mental health providers***

8  
9

10 In order of frequency, 47 liaison services (77%) co-existed in the acute hospital with separate drug or  
11 alcohol services, 44 (72%) with clinical psychology, and 22 (36%) co-existed with health psychology.  
12 We identified a wide range of other services – for particular patient groups or for overlapping  
13 patient groups by other agencies.  
14  
15

### 16 ***Referral to local service providers***

17  
18

19 The ease of referral to other mental health services for patients requiring follow up was also  
20 investigated. All services said they could routinely refer to a local community mental health team,  
21 52 (85%) could refer to a crisis team routinely, 54 (89%) could refer routinely to drug and or alcohol  
22 and the same number to older adult psychiatry. Over half (n=36, 59%) of services could routinely  
23 refer to clinical psychology and 19 (31%) to health psychology.  
24  
25

### 26 ***Non-clinical activity***

27  
28

29 All services we interviewed provided some form of non-clinical work in the form of staff training or  
30 educational sessions, medico-legal assessments, advice to managers and others. The most common  
31 non-clinical services were: dementia training (n=17); research and service evaluation (n=16);  
32 organizational support and advice to acute hospital staff (n=15); delirium training (n=11); Mental  
33 Capacity Act training (n=10).  
34  
35

### 36 **Discussion**

37  
38

39 We identified widespread availability of liaison psychiatry services in acute hospitals in England.  
40 Liaison psychiatry teams were customarily multidisciplinary and most services saw all acute mental  
41 health problems in the hospital and adults of all ages. Our findings suggest that there has been a  
42 gradual but continued expansion in liaison psychiatry services over the last 20 years, as evidenced by  
43 several previous surveys including those focusing on consultant posts in the British Isles (18,19),  
44 services in a particular area of England (20) and the one previous unpublished national survey  
45 undertaken at the request of NHS-England (LPSE-1). As an example of the expansion, the number of  
46 consultant posts in liaison psychiatry in the British Isles more than doubled from 43 in 1998 (18) to  
47 93 in 2003 (19). The findings of the current survey suggest a further increase with 195 consultant  
48 posts in liaison psychiatry in England alone.  
49  
50

51  
52 We found 11 hospitals that reported having no liaison service at all, which is concerning given that  
53 one of the targets set by NHS England in the Five Year Forward View for Mental Health is that by  
54 2020 no acute hospitals should be without all-age mental health liaison services in emergency  
55 departments and inpatient wards (21).  
56  
57

1  
2  
3  
4 Only a third of services offered outpatient clinics and non-acute care. The range of such activities  
5 was wide, with more than 30 different specialist services. There was however very little in common  
6 between services about which specialist activities were supported. Surprisingly few services (just  
7 over 10% of our total sample) reported running clinics that supported longer-term follow up and  
8 treatment opportunities, a *sine qua non* for the management of problems with living with long-term  
9 illness or of severe and chronic medically unexplained symptoms (22). This gap in service provision  
10 was most striking in self-harm services; we found that the majority of services offered acute  
11 assessment but no service offered routine therapeutic treatment for service users.  
12  
13

14  
15  
16 Very few of the services we surveyed readily fitted into the current commissioning framework (13),  
17 or the RAID framework, so the classification into Core, Core24, Enhanced24, or Comprehensive had  
18 limited value in discriminating between hospitals, and neither descriptive framework proved useful  
19 in identifying those services that reported 24-hour 7-day acute services.  
20

21 For these reasons we sought a more practical, data-driven approach to describing service types. We  
22 chose model-based clustering to do so. Alternative approaches would have been to use one of many  
23 heuristic algorithms such as hierarchical clustering, k-means, self-organising maps, graph-theoretic  
24 approaches, or support vector machines. A generative mixture model has the advantage that it can  
25 be more general and provides a statistical framework within which to decide upon the number of  
26 clusters present. Model-based clustering has also been found to perform better than other  
27 approaches in identifying clusters (16). The models were simply parameterised since there were  
28 only 168 observations. Within a diverse picture of provision, our cluster analysis did reveal some  
29 patterns of service – the three most obvious features that distinguished between services were the  
30 hours of cover and response time standards, the likelihood of providing non-acute care in  
31 outpatients, and the decision to have separate teams for older and working age adults. Size of  
32 hospital and staffing levels (especially nursing) were important associations with the type of service  
33 offered. This suggests that when services scale up from the basic provision represented by Cluster 1  
34 (and found in smaller hospitals) they do so in one of these three directions – increasing intensity of  
35 acute work, developing outpatient and non-acute work, or developing specialist old age teams.  
36  
37  
38  
39

40 Our findings have implications for those commissioning and those providing services.  
41

42 First, we found widespread availability of liaison psychiatry services in English acute hospitals, but  
43 most teams were poorly resourced compared to published recommendations. Second, whatever  
44 local decisions are made about liaison psychiatry, our survey suggests national co-ordination of  
45 services is lacking. Third, we were struck by the unexpectedly low levels of longer-term outpatient  
46 treatment provision. Problems of adjustment to long-term illness, persistently poor adherence to  
47 challenging treatment regimes, medically unexplained symptoms and severe somatoform disorders  
48 all form part of the *raison d'être* for liaison psychiatry and their management requires sustained  
49 professional input, in the hospital as well as in community settings. Our results confirm previous  
50 findings about the low national level of provision for people who harm themselves.  
51  
52

53  
54 There are several limitations to our study. Our approach to surveying provided a rather general high-  
55 level account of services that doesn't do full justice to the richness and diversity of provision in  
56 multi-component services. Reliance on a single (or occasionally a second) informant at each stage  
57  
58

1  
2  
3 may have led to missing or inaccurate information. The service descriptors we used were based on  
4 self-report, and we have not verified them with direct independent observation. Our sampling  
5 strategy meant we did not collect information on specialist hospitals without Emergency  
6 Departments, so we did not collect data on rare but important facilities in specialist hospitals. Our  
7 survey was entirely hospital focused and while we are aware of (and involved in) initiatives to  
8 develop and evaluate primary care-based liaison psychiatry services, they were not studied here.  
9

10  
11 There is increasing interest in the idea that well-run liaison psychiatry services can be both important  
12 in improving quality of care in acute hospitals and cost-effective (23-25). UK liaison services are  
13 changing rapidly, with a round of investment especially in provision for emergency assessment and  
14 response (26). A further national survey of all English acute hospitals has been completed and the  
15 results will be published in the near future. It is hoped this latest survey will provide further  
16 coverage of a rapidly changing landscape.  
17

18  
19 Liaison psychiatry services in the UK are being encouraged by their specialty representative group in  
20 the Royal College of Psychiatrists to use a standardised package of outcome measures, the  
21 Framework for Routine Outcome Measurement in Liaison Psychiatry (FROM-LP) (27), to enable  
22 benchmarking against national norms. On the basis of these and other evaluation exercises we  
23 expect to achieve an increasingly detailed and nuanced account of the nature and impact of liaison  
24 psychiatry – a subspecialty that has a valuable role in providing genuinely co-ordinated and inclusive  
25 healthcare.  
26  
27  
28  
29  
30  
31  
32  
33  
34  
35  
36  
37  
38  
39  
40  
41  
42  
43  
44  
45  
46  
47  
48  
49  
50  
51  
52  
53  
54  
55  
56  
57  
58  
59  
60

1  
2  
3  
4  
5 **Acknowledgments:** This work was supported by the efforts of S Keane, M Heneghan, S Chee, J Lewis,  
6 S Jayakumar at the Royal College of Psychiatrists and the NIHR Clinical Research Network (CRN)  
7 Yorkshire and Humber.  
8

9 **Funding:** The present study arises from two funding initiatives: A national survey of staffing and  
10 structure in liaison psychiatry services in acute hospitals completed on behalf of the Royal College of  
11 Psychiatrists and the National Collaborating Centre for Mental Health commissioned by NHS England  
12 (Liaison Psychiatry Survey of England 2015, LPSE 2015) and a research study funded by the UK's  
13 National Institute for Health Research HS&DR programme to evaluate the effectiveness and cost-  
14 effectiveness of liaison psychiatry services (LP-MAESTRO project number 13/58/08).  
15  
16

17 **Department of Health Disclaimer:** The views and opinions expressed therein are those of the  
18 authors and do not necessarily reflect those of the HS&DR, NIHR, NHS or the Department of Health.  
19

20 **Author Contributions:** AH, MJC, EG, and PT conceived of the research. JRB and WL carried out the  
21 survey. AW co-ordinated the telephone interviews. RW carried out the statistical analysis. All  
22 authors contributed to the manuscript and approved the final version.  
23  
24

25 **Provenance and peer review:** Not commissioned; externally peer reviewed.  
26

27 **Competing Interests:** All authors have completed the ICMJE uniform disclosure form at  
28 [http://www.icmje.org/coi\\_disclosure.pdf](http://www.icmje.org/coi_disclosure.pdf) and declare: no support from any organization for the  
29 submitted work; no financial relationships with any organizations that might have an interest in the  
30 submitted work in the previous three years, no other relationships or activities that could appear to  
31 have influenced the submitted work.  
32

### 33 ***Ethical approval and consent***

34  
35 Return of the email survey was taken as implicit consent. NHS Ethical permission (REC reference:  
36 15/NS/0025) and Trust level approval was obtained for the telephone interviews. Telephone survey  
37 interviewees provided verbal consent at the start of the interview.  
38  
39  
40  
41

### 42 **Data Sharing**

43  
44 Survey data are available from the author WL.  
45  
46  
47  
48  
49  
50  
51  
52  
53  
54  
55  
56  
57  
58  
59  
60

## References

1. Lipowski Z. Consultation-liaison psychiatry: the first half century. *General hospital psychiatry*. 1986;8(5):305-15.
2. Mayou R. The history of general hospital psychiatry. *The British Journal of Psychiatry*. 1989;155(6):764-76.
3. Schwab JJ. Consultation-liaison psychiatry: a historical overview. *Psychosomatics*. 1989;30(3):245-54.
4. Aitken P, Lloyd G, Mayou R, Bass C, Sharpe M. A history of liaison psychiatry in the UK. *BJPsych Bull* 2016; 40: 199-203.
5. The Royal College of Psychiatrists. A competency-based curriculum for specialist training in psychiatry: sub-specialist module in liaison psychiatry. RCPsych London. 2006.
6. Bourgeois J HD, Servis M, Hales R. Consultation-liaison psychiatry: advantages for healthcare systems. *Disease Management and Health Outcomes*. 2005;13(2):93-106.
7. Academy of Medical Royal Colleges. *Managing Urgent Mental Health needs in the Acute Hospital: a guide for practitioners, managers and commissioners*. London 2009.
8. Joint Commissioning Panel for Mental Health.. *Guidance for commissioners of liaison mental health services to acute hospitals*. London. 2012.
9. Parsonage M, Fossey M, Tutty C. *Liaison psychiatry in the modern NHS*. London: Centre for Mental Health. 2012.
10. Strain JJ, Hammer JS, Fulop G. APM task force on psychosocial interventions in the general hospital inpatient setting: a review of cost-offset studies. *Psychosomatics*. 1994;35(3):253-62.
11. Parsonage M, Fossey M. *Economic evaluation of a liaison psychiatry service*: Centre for Mental Health London; 2011.
12. Tadros G, Salama RA, Kingston P, Mustafa N, Johnson E, Pannell R, et al. Impact of an integrated rapid response psychiatric liaison team on quality improvement and cost savings: the Birmingham RAID model. *The Psychiatrist Online*. 2013;37(1):4-10.
13. Aitken P, Robens S, Emmens T. *Developing Models for Liaison Psychiatry Services-Guidance*. Strategic Clinical Network for Mental Health, Dementia and Neurological Conditions South West. England 2014.
14. Department of Health, England. *Achieving Better Access to Mental Health Services by 2020*. London. 2014.
15. Barrett J, Aitken P, Lee W. Report of the 2nd Annual Survey of Liaison Psychiatry in England. Royal College of Psychiatrists [https://www.rcpsych.ac.uk/pdf/CALC\\_LIA2015WilliamLee1.pdf](https://www.rcpsych.ac.uk/pdf/CALC_LIA2015WilliamLee1.pdf) Retrieved Dec 12 2017
16. Linzer DA, Lewis JB. polCA: An R package for polytomous variable latent class analysis. *Journal of Statistical Software*. 2011;42(10):1-29.
17. Yeung KY, Fraley C, Murua A, Raftery AE, Ruzzo WL. Model-based clustering and data transformations for gene expression data. *Bioinformatics*. 2001;17(10):977-87.
18. Guthrie E Development of liaison psychiatry: Real expansion or a bubble that is about to burst. *BJPsych Bulletin* 1998; 22:291-293.
19. Swift G, Guthrie E. Liaison psychiatry continues to expand: developing services in the British Isles. *BJPsych Bulletin* 2003; 27: 339-341.
20. Ruddy R, House A. A standard liaison psychiatry service structure? *The Psychiatrist*. 2003;27(12):457-60.



- 1  
2  
3 21. Mental Health Taskforce Strategy. The Five Year Forward View for Mental Health. A report from  
4 the independent Mental Health Taskforce to the NHS in England. Feb 2016 www.  
5 nhs.uk/mentalhealth/taskforce  
6  
7 22. Creed FH, van der Feltz-Cornelius C, Guthrie E, Henningsen P, Rief W, Schroder A, White P.  
8 Identification, assessment and treatment of individual patients. Chapter in Medically Unexplained  
9 Symptoms, Somatisation and Bodily Distress: Developing better clinical services. Eds F Cree, P  
10 Henningsen & p Fink. Cambridge University Press. 2011 p175-216.  
11  
12 23. Wood R, Wand AP. The effectiveness of consultation-liaison psychiatry in the general  
13 hospital setting: a systematic review. Journal of psychosomatic research. 2014;76(3):175-92.  
14  
15 24. de Araujo Andreoli PB, de Albuquerque Citero V, de Jesus Mari J. A systematic review of  
16 studies of the cost-effectiveness of mental health consultation-liaison interventions in general  
17 hospitals. Psychosomatics. 2003;44(6):499-507.  
18 25. Hosaka T, Aoki T, Watanabe T, Okuyama T, Kurosawa H. General hospital psychiatry from the  
19 perspective of medical economics. Psychiatry and clinical neurosciences. 1999;53(4):449-53.  
20  
21 26. NHS England . Guidance to support the introduction of access and waiting time standards  
22 for mental health services in 2015/16. [https://www.england.nhs.uk/wp-](https://www.england.nhs.uk/wp-content/uploads/2015/02/mh-access-wait-time-guid.pdf)  
23 [content/uploads/2015/02/mh-access-wait-time-guid.pdf](https://www.england.nhs.uk/wp-content/uploads/2015/02/mh-access-wait-time-guid.pdf) Retrieved 10 Dec 2017.  
24  
25 27. Trigwell P, Kustow J, Santhouse A, et al. *Framework for Routine Outcome Measurement in Liaison*  
26 *Psychiatry (FROM-LP)*. Faculty Report FR/LP/02. Royal College of Psychiatrists, 2015.  
27  
28  
29  
30  
31  
32  
33  
34  
35  
36  
37  
38  
39  
40  
41  
42  
43  
44  
45  
46  
47  
48  
49  
50  
51  
52  
53  
54  
55  
56  
57  
58  
59  
60

**Table 1: The characteristics derived from survey responses used to distinguish Liaison Psychiatry services in the model based clustering**

|                                                                                                                                                                                       |                                                                                                                                                                                                                                                                                                                                                                                                                                          |
|---------------------------------------------------------------------------------------------------------------------------------------------------------------------------------------|------------------------------------------------------------------------------------------------------------------------------------------------------------------------------------------------------------------------------------------------------------------------------------------------------------------------------------------------------------------------------------------------------------------------------------------|
| <b>Labelling</b>                                                                                                                                                                      | <ol style="list-style-type: none"> <li>1. Does the name of the service include 'RAID'?</li> <li>2. Is the service classified as Sub-core, Core, or does it meet one of the definitions Core 24, Enhanced, or Comprehensive?</li> <li>3. Does the service operate 7 days per week, or for less than 7 days?</li> <li>4. How many hours per week is the service provided?</li> </ol>                                                       |
| <b>Coverage</b>                                                                                                                                                                       | <ol style="list-style-type: none"> <li>5. Does the service claim to cover all mental health?</li> <li>6. Is there a dedicated working-age adults (18–65) team?</li> <li>7. Is there a dedicated older adults (65+) team?</li> </ol>                                                                                                                                                                                                      |
| <b>Work done</b>                                                                                                                                                                      | <ol style="list-style-type: none"> <li>8. Does the service undertake work from the Emergency Department?</li> <li>9. Does the service undertake in-reach work?</li> <li>10. Does the service operate an out-patient clinic?</li> <li>11. Does the service have pathways other than acute pathways?</li> <li>12. What is the response time for the Emergency Department?</li> <li>13. What is the response time for the wards?</li> </ol> |
| Other aspects of hospitals<br>(Note that for some variables, the value assigned may have been inferred from other survey responses rather than taken from the direct response given.) | <ol style="list-style-type: none"> <li>14. Number of services within a hospital (1,2, or 3)</li> <li>15. Number of providers of services (1 or 2)</li> <li>16. Number of hospital beds</li> <li>17. Number of nurses employed by the liaison psychiatry service</li> <li>18. Number of consultants</li> <li>19. Number of services</li> <li>20. Number of service providers</li> </ol>                                                   |
| Additional variables                                                                                                                                                                  | <ol style="list-style-type: none"> <li>21. Does the service meet the original RAID criteria?</li> <li>22. Does the service meet the modified RAID criteria?</li> </ol>                                                                                                                                                                                                                                                                   |

RAID = Rapid Assessment Intervention and Discharge

**Table 2: Hospital characteristics according to cluster membership**

| Hospital characteristic                 | Cluster 1<br>N=46 | Cluster 2<br>N=35 | Cluster 3<br>N=43 | Cluster 4<br>N=44 |
|-----------------------------------------|-------------------|-------------------|-------------------|-------------------|
| RAID                                    |                   |                   |                   |                   |
| Name has RAID in title                  | 1 (2%)            | 7 (20%)           | 10 (23%)          | 1 (2%)            |
| Not codable for RAID                    | 3 (6%)            | 1 (3%)            | 5 (12%)           | 1 (2%)            |
| Not RAID                                | 43 (94%)          | 11 (31%)          | 20 (46%)          | 43 (98%)          |
| Original RAID                           | 0 -               | 0 -               | 6 (14%)           | 0 -               |
| Modified RAID                           | 0 -               | 23 (66%)          | 12 (28%)          | 0 -               |
| Core classification                     |                   |                   |                   |                   |
| Sub-Core                                | 45 (98%)          | 23 (66%)          | 29 (67%)          | 36 (82%)          |
| Core                                    | 1 (2%)            | 5 (14%)           | 7 (16%)           | 5 (11%)           |
| Core 24                                 | 0 -               | 7 (20%)           | 3 (7%)            | 3 (7%)            |
| Enhanced24                              | 0 -               | 0 -               | 3 (7%)            | 0 -               |
| Comprehensive                           | 0 -               | 0 -               | 1 (2%)            | 0 -               |
| Service operates 7 days                 | 33 (72%)          | 34 (97%)          | 34 (79%)          | 40 (91%)          |
| Hours of Operation                      |                   |                   |                   |                   |
| 40–80 hours                             | 15 (33%)          | 1 (3%)            | 8 (19%)           | 15 (34%)          |
| 81–167 hours                            | 16 (34%)          | 7 (20%)           | 13 (30%)          | 15 (34%)          |
| 7x24 = 168 hours                        | 15 (33%)          | 27 (77%)          | 22 (51%)          | 14 (31%)          |
| Serves all MH                           | 32 (70%)          | 21 (60%)          | 26 (60%)          | 19 (43%)          |
| Dedicated WAA                           | 0 -               | 0 -               | 0 -               | 44 (100%)         |
| Dedicated OAA                           | 0 -               | 0 -               | 0 -               | 44 (100%)         |
| OP clinic                               | 2 -               | 0 -               | 43 (100%)         | 14 (32%)          |
| Non-acute pathway                       | 0 -               | 0 -               | 43 (100%)         | 14 (32%)          |
| Response time to the ED                 |                   |                   |                   |                   |
| <1h                                     | 3 (6%)            | 35 (100%)         | 25 (58%)          | 12 (27%)          |
| 1.5–4h                                  | 17 (37%)          | 0 -               | 4 (9%)            | 11 (25%)          |
| Not stated or >4h                       | 26 (57%)          | 0 -               | 14 (33%)          | 21 (48%)          |
| Response time to wards                  |                   |                   |                   |                   |
| <24h                                    | 8 (17%)           | 29 (83%)          | 23 (53%)          | 13 (30%)          |
| 36h–5d                                  | 8 (17%)           | 6 (17%)           | 0 -               | 8 (18%)           |
| Not stated                              | 30 (65%)          | 0 -               | 20 (46%)          | 23 (52%)          |
| Hospital beds                           |                   |                   |                   |                   |
| 50–447                                  | 19 (41%)          | 14 (40%)          | 12 (28%)          | 8 (18%)           |
| 447–621                                 | 20 (43%)          | 8 (24%)           | 16 (37%)          | 16 (36%)          |
| 622–1943                                | 7 (15%)           | 13 (54%)          | 17 (40%)          | 20 (45%)          |
| Number of FTE nurses                    |                   |                   |                   |                   |
| 0.5–6.0                                 | 25 (54%)          | 8 (23%)           | 11 (26%)          | 16 (36%)          |
| 6.1–9.4                                 | 15 (33%)          | 11 (31%)          | 11 (26%)          | 15 (34%)          |
| 9.5–24.0                                | 6 (13%)           | 16                | 21 (49%)          | 13 (30%)          |
| Number of FTE consultants               |                   |                   |                   |                   |
| 0.0–0.5                                 | 27 (57%)          | 7 (20%)           | 9 (21%)           | 15 (34%)          |
| 0.6–1.4                                 | 16 (35%)          | 13 (37%)          | 12 (28%)          | 13 (30%)          |
| 1.5–9.2                                 | 3 (6%)            | 15 (43%)          | 22 (51%)          | 16 (36%)          |
| Single service provider                 | 45 (98%)          | 33 (94%)          | 41 (95%)          | 40 (91%)          |
| Two service providers                   | 1 (2%)            | 2 (6%)            | 2 (5%)            | 4 (9%)            |
| Number of services within same hospital |                   |                   |                   |                   |
| One                                     | 44 (96%)          | 35 (100%)         | 39 (91%)          | 27 (61%)          |
| Two                                     | 1 (2%)            | 0 -               | 4 (9%)            | 16 (36%)          |
| Three                                   | 1 (2%)            | 0 -               | 0 -               | 1 (2%)            |

MH Mental Health WAA= Working Age Adults OAA =Older Adults Service FTE= Full time equivalent

**Appendix 1: Questions used in the Second National Liaison Psychiatry Survey (LPSE-2) in 2015.**

Questions 1-10: Location

1. What is the name of your Liaison Psychiatry service (if it has one)?
2. What is the name of the Acute Hospital(s) you are based in?
3. What is the name of the Acute Trust(s) you are based in?
4. Does the Acute Trust(s) have more than one site with inpatient beds? If so, please name them.
5. Does the Acute Trust(s) have more than one A&E? If so, please name them.
6. Does your Liaison Psych service provide services to all the sites?
7. If not, can you give us a contact details of the other liaison psychiatry service(s) please?
8. What is the provider of your service? (Usually this is the mental health trust)
9. Is psych liaison in your Acute Trust provided by one or many providers? If many, which?  
If the above questions do not capture details of your service, please explain here:

Questions 11-12: Target population

10. What services do you provide, and to whom? (Some only see self-harms, some see anyone in the whole hospital, others are in-between. Some look after alcohol problems, some not, some do LD, some not, etc.) What are the age-criteria for your service(s)?
11. Do you support anything other than the acute care pathway? Are there any clinics, etc. If so, can you outline the nature of the work?

Questions 13-18: Staffing

12. Number of FTE nurses and their bands (if working age adults and older adults are separate services, please collate these separately)
13. Number of FTE doctors and their grades (if working age adults and older adults are separate services, please collate these separately).
14. Number of FTE admins and their grades (if working age adults and older adults are separate services, please collate these separately).
15. Number of other clinicians and their grades if known (if working age adults and older adults are separate services, please collate these separately).
16. Number of other non-clinicians and their grades if known (if working age adults and older adults are separate services, please collate these separately).
17. Of the above, who is substantive and who is a locum, part of winter pressures. fixed term appointments, etc?

Questions 19-20: funding

18. What is your service's budget, if known? (Leave out the medics (or just junior medics) if necessary).
19. How much of that that budget is permanent and how much is temporary (if known)?

Questions 21-23: Mental health service context

20. What are your service's hours of operation? (Out Of Hours SHO cover does not mean your service is 24/7).
21. Does your service do all the work contained in all the referrals? (eg is some passed on to other services? Please explain)  
  
(This question is about things like requests for psych opinions from wards, which are sometimes passed straight on to the duty SHO)
22. Are there other mental health workers in your acute trust who are not part of your service? (eg counsellors, psychologists)

Questions 24-28: Commissioning context

23. Have you undertaken any research (published or not) to support the development of your service? If so, can you describe it please?
24. Is your service better resourced than it was a year ago? If so, how? If worse, please also explain.
25. If the services are separate, how do people transfer from CAMHS to Working Age Adults and from Working Age Adults to Older Persons?  
(This is usually age cut-offs plus exceptions and complications. There seems to be huge variety in this and we would like to catalogue it.)

1  
2  
3  
4  
5  
6  
7  
8  
9  
10  
11  
12  
13  
14  
15  
16  
17  
18  
19  
20  
21  
22  
23  
24  
25  
26  
27  
28  
29  
30  
31  
32  
33  
34  
35  
36  
37  
38  
39  
40  
41  
42  
43  
44  
45  
46  
47  
48  
49  
50  
51  
52  
53  
54  
55  
56  
57  
58  
59  
60

26. Does your service have a response time standard and is that time agreed with referrers and/or commissioners?

For peer review only

**Appendix 2: Original and Modified criteria for describing Rapid Access Intervention and Discharge (RAID) services**

|                          |                                                                                                                                                                                                                                                                                                                                                                                                            |
|--------------------------|------------------------------------------------------------------------------------------------------------------------------------------------------------------------------------------------------------------------------------------------------------------------------------------------------------------------------------------------------------------------------------------------------------|
| Original RAID definition | <ul style="list-style-type: none"> <li>• 24 hours, 7 days a week</li> <li>• Age inclusive; no separate Older Age Adult or Working Age Adult teams</li> <li>• Response targets of 1 hour to Emergency Department, 24 hours to wards</li> <li>• Multidisciplinary team</li> <li>• Comprehensive; see referrals for all clinical problems</li> <li>• Brief follow-up clinics</li> </ul>                       |
| Modified RAID definition | <ul style="list-style-type: none"> <li>• 24 hours, 7 days a week</li> <li>• Age inclusive; no dedicated Older Age Adult or Working Age Adult service</li> <li>• Multidisciplinary team</li> <li>• Response targets of 1 hour to Emergency Department , 24 hours to wards</li> <li>• Either, not comprehensive (e.g. do not see substance misuse or self-harm referrals) or no follow-up clinics</li> </ul> |

Appendix 3: Core classifications according to Aitken et al, 2014. (13)

| SubCore       | Less Than Core                                                                                                                                                                                                                                                                                                         |
|---------------|------------------------------------------------------------------------------------------------------------------------------------------------------------------------------------------------------------------------------------------------------------------------------------------------------------------------|
| Core          | 2 consultants, 0.6 other medical,<br>2 band 7 nurses,<br>6 band 6 nurses,<br>0 other therapists<br>1 band 7 team manager,<br>0.2 band 8 clinical services manager<br>2.6 admins<br>9-5 hours<br>Sees everyone aged 16+                                                                                                 |
| Core24        | 2 consultants, 2 other medical<br>6 band 7 nurses<br>7 band 6 nurses<br>4 other therapists<br>1 band 7 team manager<br>0.2-0.4 band 8 clinical services manager<br>2 admins<br>1 business support<br>24/7<br>Special older adults<br>Special Drugs and alcohol                                                         |
| Enhanced      | 4 consultants, 2 other medical<br>3 band 7 nurses<br>7 band 6 nurses<br>2 other therapists<br>1 band 7 team manager<br>0.2-0.4 band 8 clinical services manager<br>2 admins<br>1 business support<br>24/7<br>Special older adults<br>Special Drugs and alcohol<br>Outpatient services.                                 |
| Comprehensive | 5 consultants, 2 other medical<br>2 band 8b nurses<br>17 band 6 nurses<br>10 band 5 nurses<br>16 other therapists<br>3 band 7 team manager<br>1 band 8 clinical services manager<br>12 admins<br>1 business support<br>24/7<br>Special older adults<br>Special Drugs and alcohol<br>Outpatient services<br>Specialties |

1  
2  
3  
4  
5  
6  
7  
8  
9  
10  
11  
12  
13  
14  
15  
16  
17  
18  
19  
20  
21  
22  
23  
24  
25  
26  
27  
28  
29  
30  
31  
32  
33  
34  
35  
36  
37  
38  
39  
40  
41  
42  
43  
44  
45  
46  
47  
48  
49  
50  
51  
52  
53  
54  
55  
56  
57  
58  
59  
60

For peer review only



# BMJ Open

## The Organisation and Delivery of Liaison Psychiatry Services in General Hospitals in England: results of a National Survey

|                                 |                                                                                                                                                                                                                                                                                                                                                                                                                                                                                                                                                                                                                                                                                                                                                                                           |
|---------------------------------|-------------------------------------------------------------------------------------------------------------------------------------------------------------------------------------------------------------------------------------------------------------------------------------------------------------------------------------------------------------------------------------------------------------------------------------------------------------------------------------------------------------------------------------------------------------------------------------------------------------------------------------------------------------------------------------------------------------------------------------------------------------------------------------------|
| Journal:                        | <i>BMJ Open</i>                                                                                                                                                                                                                                                                                                                                                                                                                                                                                                                                                                                                                                                                                                                                                                           |
| Manuscript ID                   | bmjopen-2018-023091.R1                                                                                                                                                                                                                                                                                                                                                                                                                                                                                                                                                                                                                                                                                                                                                                    |
| Article Type:                   | Research                                                                                                                                                                                                                                                                                                                                                                                                                                                                                                                                                                                                                                                                                                                                                                                  |
| Date Submitted by the Author:   | 03-Jul-2018                                                                                                                                                                                                                                                                                                                                                                                                                                                                                                                                                                                                                                                                                                                                                                               |
| Complete List of Authors:       | Walker, Andrew; National Institute of Health Research Clinical Research Network<br>Barrett, Jessica; Royal College of Psychiatrists, National Collaborating Centre for Mental Health<br>Lee, William; University of Plymouth, Peninsula Schools of Medicine & Dentistry<br>West, Robert; University of Leeds, Leeds Institute of Health Sciences<br>Guthrie, Elspeth; University of Leeds Leeds Institute of Health Sciences, Psychological and Social Medicine<br>Trigwell, Peter; Leeds and York Partnership NHS Foundation Trust, National Inpatient Centre for Psychological Medicine<br>Quirk, Alan; Royal College of Psychiatrists, CCQI<br>Crawford, Mike; Imperial College London, Psychological Medicine<br>House, Allan; University of Leeds Leeds Institute of Health Sciences |
| <b>Primary Subject Heading</b>: | Mental health                                                                                                                                                                                                                                                                                                                                                                                                                                                                                                                                                                                                                                                                                                                                                                             |
| Secondary Subject Heading:      | Health services research                                                                                                                                                                                                                                                                                                                                                                                                                                                                                                                                                                                                                                                                                                                                                                  |
| Keywords:                       | MENTAL HEALTH, CONSULTATION-LIAISON, LIAISON PSYCHIATRY, HOSPITAL PSYCHIATRY, HEALTH SERVICES RESEARCH                                                                                                                                                                                                                                                                                                                                                                                                                                                                                                                                                                                                                                                                                    |
|                                 |                                                                                                                                                                                                                                                                                                                                                                                                                                                                                                                                                                                                                                                                                                                                                                                           |

SCHOLARONE™  
Manuscripts

1  
2  
3 The Organisation and Delivery of Liaison Psychiatry Services in General Hospitals  
4  
5 in England: results of a National Survey  
6  
7  
8

9 Walker A<sup>1</sup>, Barrett J.R<sup>2</sup>, Lee W<sup>3</sup>, West R<sup>4</sup>, Guthrie E<sup>4</sup>, Trigwell P<sup>5</sup>, Quirk A<sup>6</sup>, Crawford M.J<sup>6,7</sup>, House  
10 A<sup>4</sup>  
11

- 12  
13 1. Clinical Research Network National Coordinating Centre, National Institute of Health  
14 Research Clinical Research Network, Leeds  
15  
16 2. National Collaborating Centre for Mental Health, The Royal College of Psychiatrists  
17  
18 3. Institute of Translational and Stratified Medicine, Plymouth University Peninsula Schools  
19 of Medicine and Dentistry. Plymouth. UK.  
20  
21 4. Leeds Institute of Health Sciences, University of Leeds. Leeds. UK.  
22  
23 5. National Inpatient Centre for Psychological Medicine, Leeds and York Partnership NHS  
24 Foundation Trust. Leeds. UK.  
25  
26 6. College Centre for Quality Improvement. Royal College of Psychiatrists, London. UK.  
27  
28 7. Centre for Psychiatry. Department of Medicine. Imperial College London. London. UK.

29 Corresponding author: Professor Else Guthrie: e.a.guthrie@leeds.ac.uk  
30

31 Key words: Consultation-liaison, hospital psychiatry, liaison psychiatry, health services research,  
32 mental health  
33  
34

35  
36  
37  
38 **Word Count :3943**  
39

40 **Abstract: 298**  
41  
42  
43  
44  
45  
46  
47  
48  
49  
50  
51  
52  
53  
54  
55  
56  
57  
58  
59  
60

## ABSTRACT

**Objectives:** To describe current provision of hospital-based liaison psychiatry services in England, and to determine different models of liaison service that are currently operating in England.

**Design:** Cross-sectional observational study comprising an electronic survey followed by targeted telephone interviews.

**Setting:** All 179 acute hospitals with an Emergency Department in England.

**Participants:** 168 hospitals that had a liaison psychiatry service completed an electronic survey. Telephone interviews were conducted for 57 hospitals that reported specialist liaison services additional to provision for acute care.

**Measures:** Data included the location, service structures and staffing, working practices, relations with other mental health service providers, policies such as response times and funding. Model-based clustering was used to characterise the services. Telephone interviews identified the range of additional liaison psychiatry services provided.

**Results:** Most hospitals (141, 79%) reported a 7-day service responding to acute referrals from the Emergency Department and wards. However, under half of hospitals had 24-hour access to the service (78, 44%). A third of hospitals (57, 32%) provided non-acute liaison work including outpatient clinics and links to specialist hospital services. 156 hospitals (87%) had a multidisciplinary service including a psychiatrist and mental health nurses. We derived a four-cluster model of liaison psychiatry using variables resulting from the electronic survey; the salient features of clusters were staffing numbers, especially nursing; provision of rapid response 24-hour 7-day acute services; offering outpatient and other non-acute work, and containing age-specific teams for older adults.

**Conclusions:** This is the most comprehensive study to date of liaison psychiatry in England, and demonstrates the wide availability of such services nationally. Although all services provide an acute assessment function, there is no uniformity about hours of coverage or expectation of response times. Most services were better characterised by the model we developed than by current classification systems for liaison psychiatry.

## Article Summary

### Strengths and limitations of this study

- A comprehensive national survey of liaison psychiatry services in acute hospitals, at a time of increased government investment, and debate about equity of access to mental and physical healthcare.
- The survey obtained 100% response rate for all hospitals in England with an Emergency Department.
- Classification of services was carried out using model-based clustering.
- A limitation was that service provision was reported by the services themselves rather than based on independent observation.
- Mental health services provided by clinicians outside of the liaison psychiatry service were not comprehensively reviewed.

## INTRODUCTION

Liaison psychiatry is the sub-specialty of psychiatry concerned with clinical practice, teaching and research in non-psychiatric clinical settings: the 'liaison' referred to is therefore between psychiatry and other clinical disciplines. In the UK it has been largely based in acute ("general") hospitals. The origins of liaison psychiatry can be traced to the 1930s but substantial growth only occurred in the post-war decades (1-4): The UK's Royal College of Psychiatrists established its Faculty of Liaison Psychiatry in 1997 and first published a competency-based curriculum for postgraduate training in Liaison Psychiatry in 2009 (5).

The case for liaison psychiatry services rested initially upon observations that the prevalence of many psychiatric problems in acute hospitals is well above general population levels and that such co-morbidities can pose particular management challenges (6). People with problems such as psychosis, panic, delirium or self-harm may present to the Emergency Department, or their difficulties may become apparent on inpatient wards - perhaps requiring rapid assessment and intervention (7). Liaison psychiatry services also see people with more longstanding problems such as difficulty adjusting to severe physical illness, or complex physical health and mental health conditions – such work mostly being undertaken in outpatient clinics.

Recent interest in liaison psychiatry in the UK (8) has been focussed on two issues – cost savings that might result from the service, and the need to provide equitable access to emergency care for all patients regardless of whether their problems are primarily physical, psychiatric, or a combination (9).

The suggestion that financial savings from timely psychiatric intervention are sufficient to pay for the liaison psychiatry service undertaking that intervention, the so-called "cost-offset" effect, is not new (10). Most recently it attracted interest in the UK following the publication of a report from one English hospital which reported that their "Rapid Assessment Intervention and Discharge" (RAID) service achieved reductions in average inpatient lengths of stay in the target population of up to four days, even for patients not directly seen by the service (11) (12).

An important influence in current debate in the UK has been the classification of hospitals in terms of four service grades proposed by Aitken et al 2014 (13) (See Appendix for details). This

1  
2  
3 classification was based on services already in existence that were capable of delivering certain  
4 levels of coverage in the hospital. It has been used to inform commissioning of services, with the aim  
5 that all hospitals with Emergency Departments should have a liaison service meeting such standards  
6 by 2020 (14).  
7

8 Here we present findings from the most detailed survey of liaison psychiatry services yet undertaken  
9 in England, describing their structures and staffing levels and their relation to other mental health  
10 services associated with the acute hospitals in which they are located. The aim was to describe  
11 current provision of hospital-based liaison psychiatry services in England, and to determine different  
12 models of liaison service that are currently operating.  
13  
14

15 This work arises from the first phase of a programme of research funded by the National Institute of  
16 Health Services (NIHR), to evaluate the cost-effectiveness and efficiency of different configurations  
17 of liaison psychiatry services in England (LP-MAESTRO)  
18 (<http://www.nets.nihr.ac.uk/projects/hsdr/135808>), and an annual mapping survey of liaison  
19 services funded by Health Education England, NHS England and the Royal College of Psychiatrists. A  
20 prior survey of liaison psychiatry services was carried out in 2013, and this paper describes the  
21 second study (15), which was carried out in conjunction with the LP-MAESTRO programme.  
22  
23

## 24 **METHOD**

### 25 ***Setting and sample***

26  
27 The sample consisted of all acute hospitals in England that had an Emergency Department at the  
28 time. Acute Trusts were identified from the NHS website  
29 ([www.nhs.uk/servicedirectories/pages/nhstrustlisting.aspx](http://www.nhs.uk/servicedirectories/pages/nhstrustlisting.aspx)) and individual hospitals were then  
30 identified from Trust websites.  
31  
32

33  
34 Within each hospital liaison psychiatry service we identified *components* of service - typically defined  
35 by the part of the hospital covered by that component - for example: emergency department, ward  
36 referrals, links to specialist services, liaison psychiatry outpatient clinics.  
37

38 Each component of the service might then have different *characteristics* such as staff mix, working  
39 hours, performance targets, patient-groups seen etc.  
40

### 41 ***Design***

42  
43 Cross-sectional two-stage survey conducted by email and telephone interview.  
44

### 45 ***Measures***

46  
47 The email survey ran between 14 May and 30 April 2015. The survey was brief and allowed flexible  
48 (free text) responses. Response was by email or telephone. Non-responding hospitals and missing  
49 response items were followed up by email and telephone. The questions asked in the email are  
50 given in Appendix 1.  
51  
52

53 We derived two variables describing RAID services. The first, "original RAID", is based upon the  
54 description provided in Tadros et al (12) of the service evaluated at Birmingham City Hospital; the  
55 second, "modified RAID", is based upon the profile of current services in Birmingham still known as  
56  
57

1  
2  
3 RAID. We characterised each service according to whether they met the criteria for either of these  
4 service types. We also used responses on staffing level or working practice to classify each service  
5 according to recent guidance from NHS England that was created to help commissioners in planning  
6 service delivery (13). The grades used in the guidance are as follows: Comprehensive (full liaison  
7 provision), Enhanced 24 (staffed according to the original RAID model), Core 24 (provides acute  
8 provision for a hospital with an Emergency Department, but no out-patient work) and Core  
9 (intended for less busy hospitals); services not meeting Core criteria were classified as Sub-Core (see  
10 Appendices 2 and 3 for details).  
11

12  
13 A telephone interview survey ran between the 16.7.15 and 30.9.15. It was undertaken to obtain  
14 further details about services that reported that they provided liaison services in addition to  
15 provision for acute care of patients in the ED or on the acute hospital wards (e.g. out-patient  
16 services or specialist renal input).  
17

18  
19 Data from the survey have been published by the Royal College of Psychiatrist (15). What we present  
20 in this paper is a re-classification of these data (carried out by the LP-MAESTRO team), a statistical  
21 analysis of the data using cluster analysis, and results of the telephone survey, none of which has  
22 been previously published.  
23

#### 24 **Patient and participant involvement**

25  
26 Further work in the LP-MAESTRO programme will focus on patient experience. This will involve use  
27 of an on-line survey with service users (patients and carers) and non-psychiatric clinical staff who  
28 use liaison psychiatry services, with the aim of identifying additional outcomes and aspects of  
29 service that are not well characterised by quantitative work.  
30

31  
32 The results of the work presented in this paper will be disseminated to the liaison teams at each of  
33 the hospitals who took part in the study interviews.  
34

#### 35 **ANALYSIS**

36  
37 The main analyses were undertaken with R statistical software version 3.2.2 (R core team 2016).  
38

39  
40 A latent class model (16) was fitted to perform clustering of responding hospitals. The number of  
41 clusters to be used was determined by minimising the Bayesian Information Criterion (BIC) because  
42 the BIC tends to favour less complexity. Models were fitted only if the number of observations (168)  
43 exceeded the number of parameters used in the model, thus ensuring a positive number of degrees  
44 of freedom. Other hospital properties were extracted from the survey and used as covariates in this  
45 model-based clustering approach.  
46

47  
48 Many of the variables used in clustering were categorical. Variables which might have been regarded  
49 as continuous were categorised so that all were handled in a similar way. For example, the number  
50 of hours of operation of the service was defined as three categories: 40–80 hours per week, 81–167  
51 hours per week, and 168 (=7x24) hours per week. Since all variables to be clustered were  
52 categorical, the polytomous latent class analysis package polCA version 1.4.1 (16) with R statistical  
53 software version 3.2.0 (R core team 2015) was used for all analyses. The latent class function made  
54 use of the Expectation–Maximisation algorithm and there was the possibility of convergence to a  
55 local maximum rather than a global maximum. To overcome this, multiple starts were used (17).  
56  
57  
58  
59  
60

## RESULTS

### *Staffing and working practices*

Data were obtained on all 179 acute hospitals identified in England: 168 (94%) reported that they had a Liaison Psychiatry service; eleven had no service. All 168 hospitals with a liaison service completed the electronic survey and answered questions in follow up emails and telephone calls, ensuring that there were no missing data.

Twelve services were nurse-only services. All other services were multidisciplinary and all included at least a psychiatrist of some grade and a mental health nurse. One hundred and forty one hospitals (79%) reported at least one consultant psychiatrist as part of the team (total number =195), 95 hospitals (53%) reported other psychiatrists (non-consultant grade), 42 hospitals (23%) reported a psychologist or psychological therapist as part of the team, 26 hospitals (15%) reported allied health professionals and 52 hospitals (29%) reported other mental health staff. All 168 hospitals with a liaison service had nursing staff as part of the team and there were 1,384 whole time equivalents working in liaison services at the time of the survey.

141 hospitals (79%) provided a 7-day service and 15 hospitals (8%) provided a service Monday to Friday. Of the 141 hospitals providing 7-day services, 78 (55%) reported a 24-hour 7-day service.

Out of the 168 hospitals that had a liaison service, 75 hospitals (45%) had target response times of one hour or less for referrals from the Emergency Department and 73 hospitals (43%) reported target response times to referrals from the wards as less than one day. Sixty four hospitals (38%) had no target response time.

Nearly all of the liaison services (99%) saw patients who were referred following self-harm (167 hospitals) and many saw patients for assessment of alcohol and substance misuse (106 hospitals 63%). Only 37 services (22%) saw patients with learning disabilities. 44 services (26%) had separate older adult and working age adult teams.

57 hospitals (34%) reported a service or component of service that did more than serve the acute care pathway, and 4 of these hospitals operated virtually separate liaison services for acute and non-acute referrals.

### **Classification according to RAID and Core.**

Of the 168 hospitals, only 8 met the original RAID criteria and 35 met criteria for modified RAID. Ten liaison services had the term RAID in their title, without meeting either of the RAID criteria.

Of the 168 hospitals, one was rated as Comprehensive, three were Enhanced24 (2%), 13 were Core24 (8%), 18 were Core (11%) and 133 were Sub-Core (79%). The Comprehensive rated service met modified RAID criteria, two of the Enhanced24 services met Original RAID criteria and the final Enhanced24 service did not meet either RAID criterion. Of those services that met either RAID criterion, 28/41 (68%) were rated as Core or Sub-Core.

### ***Types of liaison psychiatry service: results from cluster analysis***

We used data from the email survey to cluster the services using characteristics listed in Table 1.



1  
2  
3 The minimum value of Bayesian Information Criterion was with four clusters, but the value for three  
4 clusters was very near the minimum also. Hence a decision was required between three and four  
5 clusters and we decided the model with four clusters was more interpretable and useful. Hospitals  
6 were assigned to a cluster according to their modal probability: that is hospitals were labelled as a  
7 certain cluster when the model gave a probability of membership of that cluster to be larger than  
8 that of any other. Table 2 shows the modal cluster membership tabulated against hospital  
9 characteristics.  
10

11  
12 Model-based clustering identified four classes. These do not represent discrete categories but  
13 rather services that are relatively similar to each other in a diverse landscape.  
14

- 15 • Cluster 1: Services tended to be based in smaller hospitals, had the smallest numbers of  
16 consultant staff and nurses. Only a minority offered 24-hour 7-day cover, few had predefined  
17 response times and none met either of the RAID criteria. Few offered outpatient clinics and none  
18 offered care outside the acute pathway.  
19
- 20 • Cluster 2: Services were most likely to meet one of the RAID criteria, providing 24-hour 7-day  
21 cover, working to response-time targets for Emergency Department and ward referrals and  
22 concentrating exclusively on the acute care pathway with no follow-up outpatient clinics.  
23
- 24 • Cluster 3: Services were more diverse with some offering 24-hour 7-day services, but the  
25 defining feature, was that they also offered outpatient clinics and covered care outside the acute  
26 care pathway; they had the highest number of consultants and nurses – number of nurses being  
27 an important determinant of the probability of membership in this cluster.  
28
- 29 • Cluster 4: These were also diverse services, a third offering outpatient clinics and work outside  
30 the acute pathway; only a minority provided 24-hour 7-day cover or worked to response time  
31 targets and none met either of the RAID criteria. All these hospitals had separate teams for  
32 working-age adults and for older persons.  
33

### 34 ***The nature of clinical services; telephone interviews***

35  
36 We undertook telephone interviews covering 57 hospitals and 61 separate liaison services; four  
37 hospitals had two distinctly different liaison teams. The telephone interviews reflected the clustering  
38 with most of those interviewed being in clusters 3 and 4: cluster 1: n=8, cluster 2: n=4, cluster 3:  
39 n=30 and cluster 4: n=19.  
40

### 41 ***Emergency Department referrals***

42  
43 57 out of the 61 services (93%) saw acute referrals from the Emergency Department. Most (53, 87%)  
44 were available Monday to Sunday, and n=32 (52%) were available 24 hours a day. 49 (80%) of the  
45 services responded to referrals of adult patients of any age, but entry criteria could be quite specific  
46 – for example, one service saw all working age adults throughout the day and older age adults only  
47 for the first half of the night. Most Emergency Department liaison psychiatry teams (51, 84%) were  
48 multidisciplinary although five consisted of nursing staff only.  
49

50  
51 Referrals from the Emergency Department varied considerably in scope and numbers; out of the 46  
52 reported referral rates the mean number of weekly referrals was 36 (min=1, max=100). In addition  
53 to assessment, most services that were interviewed (36, 59%) offered Emergency Department  
54 patients out-patient follow-up.  
55  
56

1  
2  
3 All of the 57 services which served the Emergency Department had key performance indicators, and  
4 almost three in four (n=43, 70%) measured patient outcome in some way.  
5

### 6 ***Ward referrals***

7  
8 Fifty seven services accepted ward referrals. Most (n=46, 75%) were available to wards 7 days, and  
9 nearly one third (n=20, 33%) were available to wards 24 hours a day. Almost three out of four  
10 (n=44, 72%) responded to referrals from wards for adult patients of any age, five services responded  
11 to referrals from wards only for older adults, and nine responded to referrals from wards only for  
12 working age adults.  
13

14  
15 Again most ward teams (53, 87%) were multidisciplinary teams although four consisted of medical  
16 staff only, three consisted of nursing staff only, and one staffed the ward team with psychiatrists and  
17 psychologists. Based upon 47 reported referral rates the mean number of weekly referrals was 25.  
18 All responding services assessed patients and offered short term follow-up on medical wards, and  
19 over half (n=34, 56%) offered out-patient follow-up.  
20

21  
22 50 of those we interviewed had key performance indicators for wards, and 42 (69%) measured  
23 patient outcome in some way for ward referrals.  
24

### 25 ***Self-harm referrals***

26  
27 All but two services accepted referrals for self-harm. 51 (84%) offered a 7 day service, 29 (48%)  
28 provided a service 24 hours a day, and most (n=46, 75%) offered a service to adults of all ages.  
29

30  
31 Most services we interviewed (54, 89%) said their self-harm teams were multidisciplinary. All  
32 services assessed patients on wards and approximately half (n=31, 51%) offered short-term follow-  
33 up on medical wards. Only eight services described a separate self-harm out-patient clinic, although  
34 several services described seeing small numbers of selected patients.  
35

### 36 ***Liaison psychiatry with named specialist services***

37  
38 Twenty services (33%) provided specialist liaison services to at least one named specialist service or  
39 department in the hospital. A total of 31 different specialist services were reported; the most  
40 frequently reported were gastroenterology (n=5), hepatology (n=4) palliative care (n=4), maternity,  
41 neurology, trauma and transplant (n=3 each).  
42

### 43 ***Outpatient clinics***

44  
45 33 services (54%) provided a general liaison psychiatry outpatient clinic and 28 services (46%)  
46 reported running an outpatient clinic for particular specialist groups; 20 services had both types of  
47 clinic. Twenty two of the general liaison psychiatry clinics saw patients of any adult age and 11  
48 clinics saw working age adults only. Thirteen clinics were staffed with a multidisciplinary team, 15  
49 were solely medical, two had nursing staff only and three clinics included a psychologist. Referrals  
50 to the general liaison psychiatry clinic came predominantly from the acute hospital in which they  
51 were based (n=26). Thirty one clinics offered short-term treatment and follow-up and 18 offered  
52 longer-term treatment and follow-up.  
53  
54  
55  
56  
57  
58  
59  
60

1  
2  
3 The most commonly reported specialist clinics were for medically unexplained symptoms (n=7),  
4 diabetes (n=4), bariatric surgery patients (n=4), respiratory disease (n=3) and perinatal psychiatry  
5 (n=3). Most clinics offered some form of psychological therapy – Problem Solving Therapy, (n=46,  
6 75%) Motivational Interviewing, (n=38, 62%) Cognitive Behavioural Therapy (n=35, 57%) Behavioural  
7 Activation (n=31, 51%) or Interpersonal Therapy (n=26, 43%).  
8  
9

### 10 ***Other acute hospital mental health providers***

11  
12  
13  
14 In order of frequency, 47 liaison services (77%) co-existed in the acute hospital with separate drug or  
15 alcohol services, 44 (72%) with clinical psychology, and 22 (36%) co-existed with health psychology.  
16 We identified a wide range of other services – for particular patient groups or for overlapping  
17 patient groups by other agencies.  
18  
19

### 20 ***Referral to local service providers***

21  
22  
23 The ease of referral to other mental health services for patients requiring follow up was also  
24 investigated. All services said they could routinely refer to a local community mental health team,  
25 52 (85%) could refer to a crisis team routinely, 54 (89%) could refer routinely to drug and or alcohol  
26 and the same number to older adult psychiatry. Over half (n=36, 59%) of services could routinely  
27 refer to clinical psychology and 19 (31%) to health psychology.  
28  
29

### 30 ***Non-clinical activity***

31  
32 All services we interviewed provided some form of non-clinical work in the form of staff training or  
33 educational sessions, medico-legal assessments, advice to managers and others. The most common  
34 non-clinical services were: dementia training (n=17); research and service evaluation (n=16);  
35 organizational support and advice to acute hospital staff (n=15); delirium training (n=11); Mental  
36 Capacity Act training (n=10).  
37  
38  
39

### 40 **Discussion**

41  
42 We identified widespread availability of liaison psychiatry services in acute hospitals in England.  
43 Liaison psychiatry teams were customarily multidisciplinary and most services saw all acute mental  
44 health problems in the hospital and adults of all ages. Our findings suggest that there has been a  
45 gradual but continued expansion in liaison psychiatry services over the last 20 years, as evidenced by  
46 several previous surveys including those focusing on consultant posts in the British Isles (18,19),  
47 services in a particular area of England (20) and the one previous unpublished national survey  
48 undertaken at the request of NHS-England (LPSE-1). As an example of the expansion, the number of  
49 consultant posts in liaison psychiatry in the British Isles more than doubled from 43 in 1998 (18) to  
50 93 in 2003 (19). The findings of the current survey suggest a further increase with 195 consultant  
51 posts in liaison psychiatry in England alone.  
52  
53  
54  
55  
56  
57  
58  
59  
60

1  
2  
3 We found 11 hospitals that reported having no liaison service at all, which is concerning given that  
4 one of the targets set by NHS England in the Five Year Forward View for Mental Health is that by  
5 2020 no acute hospitals should be without all-age mental health liaison services in emergency  
6 departments and inpatient wards (21).  
7

8  
9 Only a third of services offered outpatient clinics and non-acute care. The range of such activities  
10 was wide, with more than 30 different specialist services. There was however very little in common  
11 between services about which specialist activities were supported. Surprisingly few services (just  
12 over 10% of our total sample) reported running clinics that supported longer-term follow up and  
13 treatment opportunities, a *sine qua non* for the management of problems with living with long-term  
14 illness or of severe and chronic medically unexplained symptoms (22). This gap in service provision  
15 was most striking in self-harm services; we found that the majority of services offered acute  
16 assessment but no service offered routine therapeutic treatment for service users.  
17  
18

19  
20 Very few of the services we surveyed readily fitted into the current commissioning framework (13),  
21 or the RAID framework, so the classification into Core, Core24, Enhanced24, or Comprehensive had  
22 limited value in discriminating between hospitals, and neither descriptive framework proved useful  
23 in identifying those services that reported 24-hour 7-day acute services.  
24  
25

26 For these reasons we sought a more practical, data-driven approach to describing service types. We  
27 chose model-based clustering to do so. Alternative approaches would have been to use one of many  
28 heuristic algorithms such as hierarchical clustering, k-means, self-organising maps, graph-theoretic  
29 approaches, or support vector machines. A generative mixture model has the advantage that it can  
30 be more general and provides a statistical framework within which to decide upon the number of  
31 clusters present. Model-based clustering has also been found to perform better than other  
32 approaches in identifying clusters (16). The models were simply parameterised since there were  
33 only 168 observations. Within a diverse picture of provision, our cluster analysis did reveal some  
34 patterns of service – the three most obvious features that distinguished between services were the  
35 hours of cover and response time standards, the likelihood of providing non-acute care in  
36 outpatients, and the decision to have separate teams for older and working age adults. Size of  
37 hospital and staffing levels (especially nursing) were important associations with the type of service  
38 offered. This suggests that when services scale up from the basic provision represented by Cluster 1  
39 (and found in smaller hospitals) they do so in one of these three directions – increasing intensity of  
40 acute work, developing outpatient and non-acute work, or developing specialist old age teams.  
41  
42  
43  
44

45 Our findings have implications for those commissioning and those providing services.  
46

47 First, we found widespread availability of liaison psychiatry services in English acute hospitals, but  
48 most teams were poorly resourced compared to published recommendations. Second, whatever  
49 local decisions are made about liaison psychiatry, our survey suggests national co-ordination of  
50 services is lacking. Third, we were struck by the unexpectedly low levels of longer-term outpatient  
51 treatment provision. Problems of adjustment to long-term illness, persistently poor adherence to  
52 challenging treatment regimes, medically unexplained symptoms and severe somatoform disorders  
53 all form part of the *raison d'être* for liaison psychiatry and their management requires sustained  
54  
55  
56  
57  
58  
59  
60

1  
2  
3 professional input, in the hospital as well as in community settings. Our results confirm previous  
4 findings about the low national level of provision for people who harm themselves.  
5

6 There are several limitations to our study. Our approach to surveying provided a rather general high-  
7 level account of services that doesn't do full justice to the richness and diversity of provision in  
8 multi-component services. Reliance on a single (or occasionally a second) informant at each stage  
9 may have led to missing or inaccurate information. The service descriptors we used were based on  
10 self-report, and we have not verified them with direct independent observation. Our sampling  
11 strategy meant we did not collect information on specialist hospitals without Emergency  
12 Departments, so we did not collect data on rare but important facilities in specialist hospitals. Our  
13 survey was entirely hospital focused and while we are aware of (and involved in) initiatives to  
14 develop and evaluate primary care-based liaison psychiatry services, they were not studied here.  
15

16  
17  
18 There is increasing interest in the idea that well-run liaison psychiatry services can be both important  
19 in improving quality of care in acute hospitals and cost-effective (23-25). UK liaison services are  
20 changing rapidly, with a round of investment especially in provision for emergency assessment and  
21 response (26). A further national survey of all English acute hospitals has been completed and the  
22 results will be published in the near future. It is hoped this latest survey will provide further  
23 coverage of a rapidly changing landscape.  
24

25  
26 Liaison psychiatry services in the UK are being encouraged by their specialty representative group in  
27 the Royal College of Psychiatrists to use a standardised package of outcome measures, the  
28 Framework for Routine Outcome Measurement in Liaison Psychiatry (FROM-LP) (27), to enable  
29 benchmarking against national norms. On the basis of these and other evaluation exercises we  
30 expect to achieve an increasingly detailed and nuanced account of the nature and impact of liaison  
31 psychiatry – a subspecialty that has a valuable role in providing genuinely co-ordinated and inclusive  
32 healthcare.  
33  
34  
35  
36  
37  
38  
39  
40  
41  
42  
43  
44  
45  
46  
47  
48  
49  
50  
51  
52  
53  
54  
55  
56  
57  
58  
59  
60

1  
2  
3  
4  
5 **Acknowledgments:** This work was supported by the efforts of S Keane, M Heneghan, S Chee, J Lewis,  
6 S Jayakumar and H Lucas at the Royal College of Psychiatrists and the NIHR Clinical Research  
7 Network (CRN) Yorkshire and Humber. J Hewison, C Czoski Murry, C Smith, C Hulme, S Tubeuf, A  
8 Martin, S Relton from the Leeds Institute of Health Sciences and Matthew Fossey from the Centre  
9 for Mental Health Research are fellow collaborators on the programme.  
10

11 **Funding:** The present study arises from two funding initiatives: A national survey of staffing and  
12 structure in liaison psychiatry services in acute hospitals completed on behalf of the Royal College of  
13 Psychiatrists and the National Collaborating Centre for Mental Health commissioned by NHS England  
14 (Liaison Psychiatry Survey of England 2015, LPSE 2015) and a research study funded by the UK's  
15 National Institute for Health Research HS&DR programme to evaluate the effectiveness and cost-  
16 effectiveness of liaison psychiatry services (LP-MAESTRO project number 13/58/08).  
17  
18

19 **Department of Health Disclaimer:** The views and opinions expressed therein are those of the  
20 authors and do not necessarily reflect those of the HS&DR, NIHR, NHS or the Department of Health.  
21  
22

23 **Author Contributions:** AH, MJC, EG, and PT conceived of the research. JRB and WL carried out the  
24 survey. AW co-ordinated the telephone interviews. RW carried out the statistical analysis. AQ and  
25 all other authors contributed to the manuscript and approved the final version.  
26

27 **Provenance and peer review:** Not commissioned; externally peer reviewed.  
28

29 **Competing Interests:** All authors have completed the ICMJE uniform disclosure form at  
30 [http://www.icmje.org/coi\\_disclosure.pdf](http://www.icmje.org/coi_disclosure.pdf) and declare: no support from any organization for the  
31 submitted work; no financial relationships with any organizations that might have an interest in the  
32 submitted work in the previous three years, no other relationships or activities that could appear to  
33 have influenced the submitted work.  
34  
35

### 36 ***Ethical approval and consent***

37  
38 Return of the email survey was taken as implicit consent. NHS Ethical permission (REC reference:  
39 15/NS/0025) and Trust level approval was obtained for the telephone interviews. Telephone survey  
40 interviewees provided verbal consent at the start of the interview.  
41  
42  
43

### 44 **Data Sharing**

45  
46 Survey data are available from the author WL.  
47  
48  
49  
50  
51  
52  
53  
54  
55  
56  
57  
58  
59  
60

## References

1. Lipowski Z. Consultation-liaison psychiatry: the first half century. *General hospital psychiatry*. 1986;8(5):305-15.
2. Mayou R. The history of general hospital psychiatry. *The British Journal of Psychiatry*. 1989;155(6):764-76.
3. Schwab JJ. Consultation-liaison psychiatry: a historical overview. *Psychosomatics*. 1989;30(3):245-54.
4. Aitken P, Lloyd G, Mayou R, Bass C, Sharpe M. A history of liaison psychiatry in the UK. *BJPsych Bull* 2016; 40: 199-203.
5. The Royal College of Psychiatrists. A competency-based curriculum for specialist training in psychiatry: sub-specialist module in liaison psychiatry. RCPsych London. 2006.
6. Bourgeois J HD, Servis M, Hales R. Consultation-liaison psychiatry: advantages for healthcare systems. *Disease Management and Health Outcomes*. 2005;13(2):93-106.
7. Academy of Medical Royal Colleges. *Managing Urgent Mental Health needs in the Acute Hospital: a guide for practitioners, managers and commissioners*. London 2009.
8. Joint Commissioning Panel for Mental Health.. *Guidance for commissioners of liaison mental health services to acute hospitals*. London. 2012.
9. Parsonage M, Fossey M, Tutty C. *Liaison psychiatry in the modern NHS*. London: Centre for Mental Health. 2012.
10. Strain JJ, Hammer JS, Fulop G. APM task force on psychosocial interventions in the general hospital inpatient setting: a review of cost-offset studies. *Psychosomatics*. 1994;35(3):253-62.
11. Parsonage M, Fossey M. *Economic evaluation of a liaison psychiatry service*: Centre for Mental Health London; 2011.
12. Tadros G, Salama RA, Kingston P, Mustafa N, Johnson E, Pannell R, et al. Impact of an integrated rapid response psychiatric liaison team on quality improvement and cost savings: the Birmingham RAID model. *The Psychiatrist Online*. 2013;37(1):4-10.
13. Aitken P, Robens S, Emmens T. *Developing Models for Liaison Psychiatry Services-Guidance*. Strategic Clinical Network for Mental Health, Dementia and Neurological Conditions South West. England 2014.
14. Department of Health, England. *Achieving Better Access to Mental Health Services by 2020*. London. 2014.
15. Barrett J, Aitken P, Lee W. Report of the 2nd Annual Survey of Liaison Psychiatry in England. Royal College of Psychiatrists [https://www.rcpsych.ac.uk/pdf/CALC\\_LIA2015WilliamLee1.pdf](https://www.rcpsych.ac.uk/pdf/CALC_LIA2015WilliamLee1.pdf) Retrieved Dec 12 2017
16. Linzer DA, Lewis JB. polCA: An R package for polytomous variable latent class analysis. *Journal of Statistical Software*. 2011;42(10):1-29.
17. Yeung KY, Fraley C, Murua A, Raftery AE, Ruzzo WL. Model-based clustering and data transformations for gene expression data. *Bioinformatics*. 2001;17(10):977-87.
18. Guthrie E Development of liaison psychiatry: Real expansion or a bubble that is about to burst. *BJPsych Bulletin* 1998; 22:291-293.
19. Swift G, Guthrie E. Liaison psychiatry continues to expand: developing services in the British Isles. *BJPsych Bulletin* 2003; 27: 339-341.

- 1  
2  
3 20. Ruddy R, House A. A standard liaison psychiatry service structure? *The Psychiatrist*.  
4 2003;27(12):457-60.  
5  
6 21. Mental Health Taskforce Strategy. The Five Year Forward View for Mental Health. A report  
7 from the independent Mental Health Taskforce to the NHS in England. Feb 2016 [www.nhs.uk/mentalhealth/taskforce](http://www.nhs.uk/mentalhealth/taskforce)  
8  
9  
10 22. Creed FH, van der Feltz-Cornelius C, Guthrie E, Henningsen P, Rief W, Schroder A, White P.  
11 Identification, assessment and treatment of individual patients. Chapter in *Medically Unexplained*  
12 *Symptoms, Somatisation and Bodily Distress: Developing better clinical services*. Eds F Creed P  
13 Henningsen & P Fink. Cambridge University Press. 2011 p175-216.  
14  
15 23. Wood R, Wand AP. The effectiveness of consultation-liaison psychiatry in the general  
16 hospital setting: a systematic review. *Journal of psychosomatic research*. 2014;76(3):175-92.  
17  
18 24. de Araujo Andreoli PB, de Albuquerque Citero V, de Jesus Mari J. A systematic review of  
19 studies of the cost-effectiveness of mental health consultation-liaison interventions in general  
20 hospitals. *Psychosomatics*. 2003;44(6):499-507.  
21 25. Hosaka T, Aoki T, Watanabe T, Okuyama T, Kurosawa H. General hospital psychiatry from the  
22 perspective of medical economics. *Psychiatry and clinical neurosciences*. 1999;53(4):449-53.  
23  
24 26. NHS England . Guidance to support the introduction of access and waiting time standards  
25 for mental health services in 2015/16. [https://www.england.nhs.uk/wp-](https://www.england.nhs.uk/wp-content/uploads/2015/02/mh-access-wait-time-guid.pdf)  
26 [content/uploads/2015/02/mh-access-wait-time-guid.pdf](https://www.england.nhs.uk/wp-content/uploads/2015/02/mh-access-wait-time-guid.pdf) Retrieved 10 Dec 2017.  
27  
28 27. Trigwell P, Kustow J, Santhouse A, et al. *Framework for Routine Outcome Measurement in*  
29 *Liaison Psychiatry (FROM-LP)*. Faculty Report FR/LP/02. Royal College of Psychiatrists, 2015.  
30  
31  
32  
33  
34  
35  
36  
37  
38  
39  
40  
41  
42  
43  
44  
45  
46  
47  
48  
49  
50  
51  
52  
53  
54  
55  
56  
57  
58  
59  
60



**Table 1: The characteristics derived from survey responses used to distinguish Liaison Psychiatry services in the model based clustering**

|                                                                                                                                                                                       |                                                                                                                                                                                                                                                                                                                                                                                                                                          |
|---------------------------------------------------------------------------------------------------------------------------------------------------------------------------------------|------------------------------------------------------------------------------------------------------------------------------------------------------------------------------------------------------------------------------------------------------------------------------------------------------------------------------------------------------------------------------------------------------------------------------------------|
| <b>Labelling</b>                                                                                                                                                                      | <ol style="list-style-type: none"> <li>1. Does the name of the service include 'RAID'?</li> <li>2. Is the service classified as Sub-core, Core, or does it meet one of the definitions Core 24, Enhanced, or Comprehensive?</li> <li>3. Does the service operate 7 days per week, or for less than 7 days?</li> <li>4. How many hours per week is the service provided?</li> </ol>                                                       |
| <b>Coverage</b>                                                                                                                                                                       | <ol style="list-style-type: none"> <li>5. Does the service claim to cover all mental health?</li> <li>6. Is there a dedicated working-age adults (18–65) team?</li> <li>7. Is there a dedicated older adults (65+) team?</li> </ol>                                                                                                                                                                                                      |
| <b>Work done</b>                                                                                                                                                                      | <ol style="list-style-type: none"> <li>8. Does the service undertake work from the Emergency Department?</li> <li>9. Does the service undertake in-reach work?</li> <li>10. Does the service operate an out-patient clinic?</li> <li>11. Does the service have pathways other than acute pathways?</li> <li>12. What is the response time for the Emergency Department?</li> <li>13. What is the response time for the wards?</li> </ol> |
| Other aspects of hospitals<br>(Note that for some variables, the value assigned may have been inferred from other survey responses rather than taken from the direct response given.) | <ol style="list-style-type: none"> <li>14. Number of services within a hospital (1,2, or 3)</li> <li>15. Number of providers of services (1 or 2)</li> <li>16. Number of hospital beds</li> <li>17. Number of nurses employed by the liaison psychiatry service</li> <li>18. Number of consultants</li> <li>19. Number of services</li> <li>20. Number of service providers</li> </ol>                                                   |
| Additional variables                                                                                                                                                                  | <ol style="list-style-type: none"> <li>21. Does the service meet the original RAID criteria?</li> <li>22. Does the service meet the modified RAID criteria?</li> </ol>                                                                                                                                                                                                                                                                   |

RAID = Rapid Assessment Intervention and Discharge

**Table 2: Hospital characteristics according to cluster membership**

| Hospital characteristic                 | Cluster 1<br>N=46 | Cluster 2<br>N=35 | Cluster 3<br>N=43 | Cluster 4<br>N=44 |
|-----------------------------------------|-------------------|-------------------|-------------------|-------------------|
| RAID                                    |                   |                   |                   |                   |
| Name has RAID in title                  | 1 (2%)            | 7 (20%)           | 10 (23%)          | 1 (2%)            |
| Not codable for RAID                    | 3 (6%)            | 1 (3%)            | 5 (12%)           | 1 (2%)            |
| Not RAID                                | 43 (94%)          | 11 (31%)          | 20 (46%)          | 43 (98%)          |
| Original RAID                           | 0 -               | 0 -               | 6 (14%)           | 0 -               |
| Modified RAID                           | 0 -               | 23 (66%)          | 12 (28%)          | 0 -               |
| Core classification                     |                   |                   |                   |                   |
| Sub-Core                                | 45 (98%)          | 23 (66%)          | 29 (67%)          | 36 (82%)          |
| Core                                    | 1 (2%)            | 5 (14%)           | 7 (16%)           | 5 (11%)           |
| Core 24                                 | 0 -               | 7 (20%)           | 3 (7%)            | 3 (7%)            |
| Enhanced24                              | 0 -               | 0 -               | 3 (7%)            | 0 -               |
| Comprehensive                           | 0 -               | 0 -               | 1 (2%)            | 0 -               |
| Service operates 7 days                 | 33 (72%)          | 34 (97%)          | 34 (79%)          | 40 (91%)          |
| Hours of Operation                      |                   |                   |                   |                   |
| 40–80 hours                             | 15 (33%)          | 1 (3%)            | 8 (19%)           | 15 (34%)          |
| 81–167 hours                            | 16 (34%)          | 7 (20%)           | 13 (30%)          | 15 (34%)          |
| 7x24 = 168 hours                        | 15 (33%)          | 27 (77%)          | 22 (51%)          | 14 (31%)          |
| Serves all MH                           | 32 (70%)          | 21 (60%)          | 26 (60%)          | 19 (43%)          |
| Dedicated WAA                           | 0 -               | 0 -               | 0 -               | 44 (100%)         |
| Dedicated OAA                           | 0 -               | 0 -               | 0 -               | 44 (100%)         |
| OP clinic                               | 2 -               | 0 -               | 43 (100%)         | 14 (32%)          |
| Non-acute pathway                       | 0 -               | 0 -               | 43 (100%)         | 14 (32%)          |
| Response time to the ED                 |                   |                   |                   |                   |
| <1h                                     | 3 (6%)            | 35 (100%)         | 25 (58%)          | 12 (27%)          |
| 1.5–4h                                  | 17 (37%)          | 0 -               | 4 (9%)            | 11 (25%)          |
| Not stated or >4h                       | 26 (57%)          | 0 -               | 14 (33%)          | 21 (48%)          |
| Response time to wards                  |                   |                   |                   |                   |
| <24h                                    | 8 (17%)           | 29 (83%)          | 23 (53%)          | 13 (30%)          |
| 36h–5d                                  | 8 (17%)           | 6 (17%)           | 0 -               | 8 (18%)           |
| Not stated                              | 30 (65%)          | 0 -               | 20 (46%)          | 23 (52%)          |
| Hospital beds                           |                   |                   |                   |                   |
| 50–447                                  | 19 (41%)          | 14 (40%)          | 12 (28%)          | 8 (18%)           |
| 447–621                                 | 20 (43%)          | 8 (24%)           | 16 (37%)          | 16 (36%)          |
| 622–1943                                | 7 (15%)           | 13 (54%)          | 17 (40%)          | 20 (45%)          |
| Number of FTE nurses                    |                   |                   |                   |                   |
| 0.5–6.0                                 | 25 (54%)          | 8 (23%)           | 11 (26%)          | 16 (36%)          |
| 6.1–9.4                                 | 15 (33%)          | 11 (31%)          | 11 (26%)          | 15 (34%)          |
| 9.5–24.0                                | 6 (13%)           | 16                | 21 (49%)          | 13 (30%)          |
| Number of FTE consultants               |                   |                   |                   |                   |
| 0.0–0.5                                 | 27 (57%)          | 7 (20%)           | 9 (21%)           | 15 (34%)          |
| 0.6–1.4                                 | 16 (35%)          | 13 (37%)          | 12 (28%)          | 13 (30%)          |
| 1.5–9.2                                 | 3 (6%)            | 15 (43%)          | 22 (51%)          | 16 (36%)          |
| Single service provider                 | 45 (98%)          | 33 (94%)          | 41 (95%)          | 40 (91%)          |
| Two service providers                   | 1 (2%)            | 2 (6%)            | 2 (5%)            | 4 (9%)            |
| Number of services within same hospital |                   |                   |                   |                   |
| One                                     | 44 (96%)          | 35 (100%)         | 39 (91%)          | 27 (61%)          |
| Two                                     | 1 (2%)            | 0 -               | 4 (9%)            | 16 (36%)          |
| Three                                   | 1 (2%)            | 0 -               | 0 -               | 1 (2%)            |

MH Mental Health WAA= Working Age Adults OAA =Older Adults Service FTE= Full time equivalent

On-line appendices for paper entitled “The Organisation and Delivery of Liaison Psychiatry Services in General Hospitals in England: results of a National Survey”.

**Appendix 1: Questions used in the Second National Liaison Psychiatry Survey (LPSE-2) in 2015.**

Questions 1-10: Location

1. What is the name of your Liaison Psychiatry service (if it has one)?
  2. What is the name of the Acute Hospital(s) you are based in?
  3. What is the name of the Acute Trust(s) you are based in?
  4. Does the Acute Trust(s) have more than one site with inpatient beds? If so, please name them.
  5. Does the Acute Trust(s) have more than one A&E? If so, please name them.
  6. Does your Liaison Psych service provide services to all the sites?
  7. If not, can you give us a contact details of the other liaison psychiatry service(s) please?
  8. What is the provider of your service? (Usually this is the mental health trust)
  9. Is psych liaison in your Acute Trust provided by one or many providers? If many, which?
- If the above questions do not capture details of your service, please explain here:

Questions 11-12: Target population

10. What services do you provide, and to whom? (Some only see self-harms, some see anyone in the whole hospital, others are in-between. Some look after alcohol problems, some not, some do LD, some not, etc.) What are the age-criteria for your service(s)?
11. Do you support anything other than the acute care pathway? Are there any clinics, etc. If so, can you outline the nature of the work?

Questions 13-18: Staffing

12. Number of FTE nurses and their bands (if working age adults and older adults are separate services, please collate these separately)
13. Number of FTE doctors and their grades (if working age adults and older adults are separate services, please collate these separately).
14. Number of FTE admins and their grades (if working age adults and older adults are separate services, please collate these separately).
15. Number of other clinicians and their grades if known (if working age adults and older adults are separate services, please collate these separately).
16. Number of other non-clinicians and their grades if known (if working age adults and older adults are separate services, please collate these separately).
17. Of the above, who is substantive and who is a locum, part of winter pressures. fixed term appointments, etc?

Questions 19-20: funding

18. What is your service's budget, if known? (Leave out the medics (or just junior medics) if necessary).
19. How much of that that budget is permanent and how much is temporary (if known)?

Questions 21-23: Mental health service context

20. What are your service's hours of operation? (Out Of Hours SHO cover does not mean your service is 24/7).
  21. Does your service do all the work contained in all the referrals? (eg is some passed on to other services? Please explain)
- (This question is about things like requests for psych opinions from wards, which are sometimes passed straight on to the duty SHO)
22. Are there other mental health workers in your acute trust who are not part of your service? (eg counsellors, psychologists)

Questions 24-28: Commissioning context

23. Have you undertaken any research (published or not) to support the development of your service? If so, can you describe it please?
24. Is your service better resourced than it was a year ago? If so, how? If worse, please also explain.

1  
2  
3  
4  
5  
6  
7  
8  
9  
10  
11  
12  
13  
14  
15  
16  
17  
18  
19  
20  
21  
22  
23  
24  
25  
26  
27  
28  
29  
30  
31  
32  
33  
34  
35  
36  
37  
38  
39  
40  
41  
42  
43  
44  
45  
46  
47  
48  
49  
50  
51  
52  
53  
54  
55  
56  
57  
58  
59  
60

- 25. If the services are separate, how do people transfer from CAMHS to Working Age Adults and from Working Age Adults to Older Persons?  
(This is usually age cut-offs plus exceptions and complications. There seems to be huge variety in this and we would like to catalogue it.)
- 26. Does your service have a response time standard and is that time agreed with referrers and/or commissioners?

For peer review only

**Appendix 2: Original and Modified criteria for describing Rapid Access Intervention and Discharge (RAID) services**

|                          |                                                                                                                                                                                                                                                                                                                                                                                                            |
|--------------------------|------------------------------------------------------------------------------------------------------------------------------------------------------------------------------------------------------------------------------------------------------------------------------------------------------------------------------------------------------------------------------------------------------------|
| Original RAID definition | <ul style="list-style-type: none"> <li>• 24 hours, 7 days a week</li> <li>• Age inclusive; no separate Older Age Adult or Working Age Adult teams</li> <li>• Response targets of 1 hour to Emergency Department, 24 hours to wards</li> <li>• Multidisciplinary team</li> <li>• Comprehensive; see referrals for all clinical problems</li> <li>• Brief follow-up clinics</li> </ul>                       |
| Modified RAID definition | <ul style="list-style-type: none"> <li>• 24 hours, 7 days a week</li> <li>• Age inclusive; no dedicated Older Age Adult or Working Age Adult service</li> <li>• Multidisciplinary team</li> <li>• Response targets of 1 hour to Emergency Department , 24 hours to wards</li> <li>• Either, not comprehensive (e.g. do not see substance misuse or self-harm referrals) or no follow-up clinics</li> </ul> |

Appendix 3: Core classifications according to Aitken et al, 2014. (13)

| SubCore       | Less Than Core                                                                                                                                                                                                                                                                         |
|---------------|----------------------------------------------------------------------------------------------------------------------------------------------------------------------------------------------------------------------------------------------------------------------------------------|
| Core          | 2 consultants, 0.6 other medical,<br>2 band 7 nurses,<br>6 band 6 nurses,<br>0 other therapists<br>1 band 7 team manager,<br>0.2 band 8 clinical services manager<br>2.6 admins<br>9-5 hours<br>Sees everyone aged 16+                                                                 |
| Core24        | 2 consultants, 2 other medical<br>6 band 7 nurses<br>7 band 6 nurses<br>4 other therapists<br>1 band 7 team manager<br>0.2-0.4 band 8 clinical services manager<br>2 admins<br>1 business support<br>24/7<br>Special older adults<br>Special Drugs and alcohol                         |
| Enhanced      | 4 consultants, 2 other medical<br>3 band 7 nurses<br>7 band 6 nurses<br>2 other therapists<br>1 band 7 team manager<br>0.2-0.4 band 8 clinical services manager<br>2 admins<br>1 business support<br>24/7<br>Special older adults<br>Special Drugs and alcohol<br>Outpatient services. |
| Comprehensive | 5 consultants, 2 other medical<br>2 band 8b nurses<br>17 band 6 nurses<br>10 band 5 nurses<br>16 other therapists<br>3 band 7 team manager                                                                                                                                             |

|  |                                                                                                                                                                          |
|--|--------------------------------------------------------------------------------------------------------------------------------------------------------------------------|
|  | 1 band 8 clinical services manager<br>12 admins<br>1 business support<br>24/7<br>Special older adults<br>Special Drugs and alcohol<br>Outpatient services<br>Specialties |
|--|--------------------------------------------------------------------------------------------------------------------------------------------------------------------------|

For peer review only

|                          |   |                                                                                                                                                                                                                                                                                                                                                                                                                  |
|--------------------------|---|------------------------------------------------------------------------------------------------------------------------------------------------------------------------------------------------------------------------------------------------------------------------------------------------------------------------------------------------------------------------------------------------------------------|
| Title and abstract       | 1 | <p>a) Title describes the design of the study-i.e. survey- The Organisation and Delivery of Liaison Psychiatry Services in General Hospitals in England: results of a National Survey</p> <p>b) Abstract provides a balanced summary of the study and its findings</p>                                                                                                                                           |
| Introduction             |   |                                                                                                                                                                                                                                                                                                                                                                                                                  |
| Background and rationale | 2 | Scientific background explained-introduction -first 5 paragraphs                                                                                                                                                                                                                                                                                                                                                 |
| Objectives               | 3 | Objectives stated, no sub-analyses. Introduction Paragraph 6- The aim was to describe current provision of hospital-based liaison psychiatry services in England, and to determine different models of liaison service that are currently operating in England.                                                                                                                                                  |
| Methods                  |   |                                                                                                                                                                                                                                                                                                                                                                                                                  |
| Study design             | 4 | Design- Cross-sectional two-stage survey conducted by email and telephone interview.                                                                                                                                                                                                                                                                                                                             |
| Setting                  | 5 | Setting is described in detail. All acute hospitals in England with an emergency department. No follow-up.                                                                                                                                                                                                                                                                                                       |
| Participants             | 6 | Two stage design: first stage survey of liaison psychiatry services in acute hospitals in England. Second stage:telephone survey involving liaison psychiatry staff at services which provide more than 'acute cover'. Intention to obtain more detailed understanding of what additional services were available at these Trusts.                                                                               |
| Variables                | 7 | No formal measures were used. Details of liaison services that were included in the survey are listed in the appendix.                                                                                                                                                                                                                                                                                           |
| Data sources/measurement | 8 | See above. Data sources were the responses to the questionnaire survey (stage one) and to the telephone interviews (staged two)                                                                                                                                                                                                                                                                                  |
| Bias                     | 9 | Our approach to surveying provided a rather general high-level account of services that doesn't do full justice to the richness and diversity of provision in multi-component services. Reliance on a single (or occasionally a second) informant at each stage may have led to missing or inaccurate information. The service descriptors we used were based on self-report, and we have not verified them with |



|                        |    |                                                                                                                                                                                                                                                                                                                                                                                                                                                                                                                                                                                                                                                                                                                                                                                                                                                                                                                                                                                                                                                                                                           |
|------------------------|----|-----------------------------------------------------------------------------------------------------------------------------------------------------------------------------------------------------------------------------------------------------------------------------------------------------------------------------------------------------------------------------------------------------------------------------------------------------------------------------------------------------------------------------------------------------------------------------------------------------------------------------------------------------------------------------------------------------------------------------------------------------------------------------------------------------------------------------------------------------------------------------------------------------------------------------------------------------------------------------------------------------------------------------------------------------------------------------------------------------------|
|                        |    | direct independent observation. Our sampling strategy meant we did not collect information on specialist hospitals without Emergency Departments, so we did not collect data on rare but important facilities in specialist hospitals. The survey was entirely hospital focused and while we are aware of (and involved in) initiatives to develop and evaluate primary care-based liaison psychiatry services, they were not studied here.                                                                                                                                                                                                                                                                                                                                                                                                                                                                                                                                                                                                                                                               |
| Study size             | 10 | All hospitals in England with an ED that had a liaison psychiatry service n=168                                                                                                                                                                                                                                                                                                                                                                                                                                                                                                                                                                                                                                                                                                                                                                                                                                                                                                                                                                                                                           |
| Quantitative variables |    | Many of the variables used in clustering were categorical. Variables which might have been regarded as continuous were categorised so that all were handled in a similar way. For example, the number of hours of operation of the service was defined as three categories: 40–80 hours per week, 81–167 hours per week, and 168 (=7x24) hours per week.                                                                                                                                                                                                                                                                                                                                                                                                                                                                                                                                                                                                                                                                                                                                                  |
| Statistical methods    |    | <p>a) A latent class model (15) was fitted to perform clustering of responding hospitals. The number of clusters to be used was determined by minimising the Bayesian Information Criterion (BIC) because the BIC tends to favour less complexity. Models were fitted only if the number of observations (168) exceeded the number of parameters used in the model, thus ensuring a positive number of degrees of freedom. Other hospital properties were extracted from the survey and used as covariates in this model-based clustering approach.</p> <p>Since all variables to be clustered were categorical, the polytomous latent class analysis package polCA version 1.4.1 (Linzer and Lewis 2011) with R statistical software version 3.2.0 (R core team 2015) was used for all analyses. The latent class function made use of the Expectation–Maximisation algorithm and there was the possibility of convergence to a local maximum rather than a global maximum. To overcome this multiple starts were used.</p> <p>There were no missing data.</p> <p>There were no sensitivity analyses</p> |
| Results                |    |                                                                                                                                                                                                                                                                                                                                                                                                                                                                                                                                                                                                                                                                                                                                                                                                                                                                                                                                                                                                                                                                                                           |
| Participants           | 13 | Responses from all eligible hospitals n=168                                                                                                                                                                                                                                                                                                                                                                                                                                                                                                                                                                                                                                                                                                                                                                                                                                                                                                                                                                                                                                                               |
| Descriptive data       | 14 | Data are provided in results section under ‘staffing and working practices’.                                                                                                                                                                                                                                                                                                                                                                                                                                                                                                                                                                                                                                                                                                                                                                                                                                                                                                                                                                                                                              |

|                   |    |                                                                                                                                                                                                                                                                                                                                                                                                                                                                                                                                                                                                                   |
|-------------------|----|-------------------------------------------------------------------------------------------------------------------------------------------------------------------------------------------------------------------------------------------------------------------------------------------------------------------------------------------------------------------------------------------------------------------------------------------------------------------------------------------------------------------------------------------------------------------------------------------------------------------|
|                   |    | No missing data                                                                                                                                                                                                                                                                                                                                                                                                                                                                                                                                                                                                   |
| Outcome data      | 15 | Main outcome data are shown in Table 2 accompanying paper. Data are presented as number and percentages                                                                                                                                                                                                                                                                                                                                                                                                                                                                                                           |
| Main results      | 16 | Survey data are represented as number and percentages.                                                                                                                                                                                                                                                                                                                                                                                                                                                                                                                                                            |
| Other analyses    | 17 | No sensitivity analyses. Cluster analysis is described in detail in statistics section.                                                                                                                                                                                                                                                                                                                                                                                                                                                                                                                           |
| Discussion        |    |                                                                                                                                                                                                                                                                                                                                                                                                                                                                                                                                                                                                                   |
| Key results       | 18 | Key results are presented with reference to study objectives.                                                                                                                                                                                                                                                                                                                                                                                                                                                                                                                                                     |
| Limitations       | 19 | Discussed full in results section-paragraph 6                                                                                                                                                                                                                                                                                                                                                                                                                                                                                                                                                                     |
| Interpretation    | 20 | Results are interpreted cautiously                                                                                                                                                                                                                                                                                                                                                                                                                                                                                                                                                                                |
| Generalisability  | 21 | Limited to hospitals in England with emergency departments.                                                                                                                                                                                                                                                                                                                                                                                                                                                                                                                                                       |
| Other information |    |                                                                                                                                                                                                                                                                                                                                                                                                                                                                                                                                                                                                                   |
| Funding           | 22 | Source of funding is stated 'The present study arises from two funding initiatives: A national survey of staffing and structure in liaison psychiatry services in acute hospitals completed on behalf of the Royal College of Psychiatrists and the National Collaborating Centre for Mental Health commissioned by NHS England (Liaison Psychiatry Survey of England 2015, LPSE 2015) and a research study funded by the UK's National Institute for Health Research HS&DR programme to evaluate the effectiveness and cost-effectiveness of liaison psychiatry services (LP-MAESTRO .project number 13/58/08).' |
